# Supplementary material for: Cartilage Oligomeric Matrix Protein promotes epithelial-mesenchymal transition by interacting with Transgelin in Colorectal Cancer
Source: PubMed Central journal article supplement (PMC7392026; doi:10.7150/thno.44456), 2020-07-09
Supplement: thnov10p8790s1.pdf [file thnov10p8790s1.pdf]

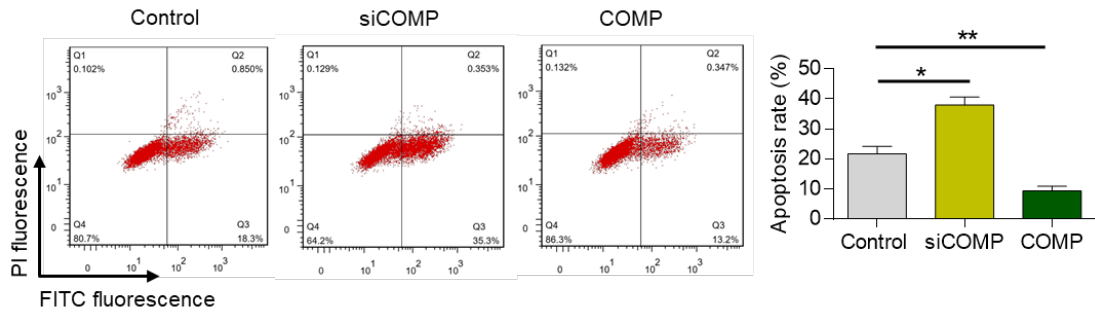

**Figure S1.** COMP protects from cell apoptosis. Apoptosis was induced in the SW620 cells by a 48-h incubation with brefeldin A. The experimental results showed that overexpression of COMP inhibited the apoptosis induced by Brefeldin A of SW620, while COMP knockdown promoted the apoptosis of SW620.

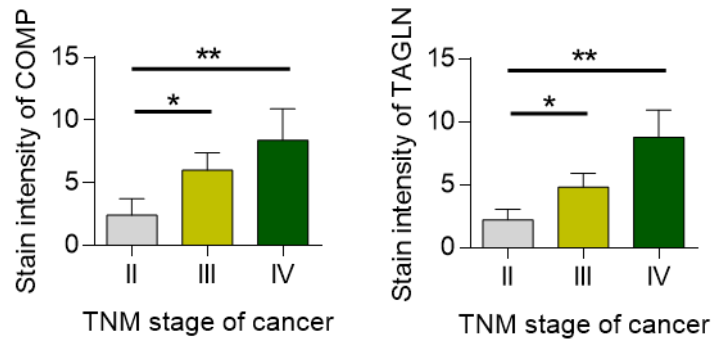

**Figure S2.** Patients with high expression of COMP and TAGLN had higher clinical staging.

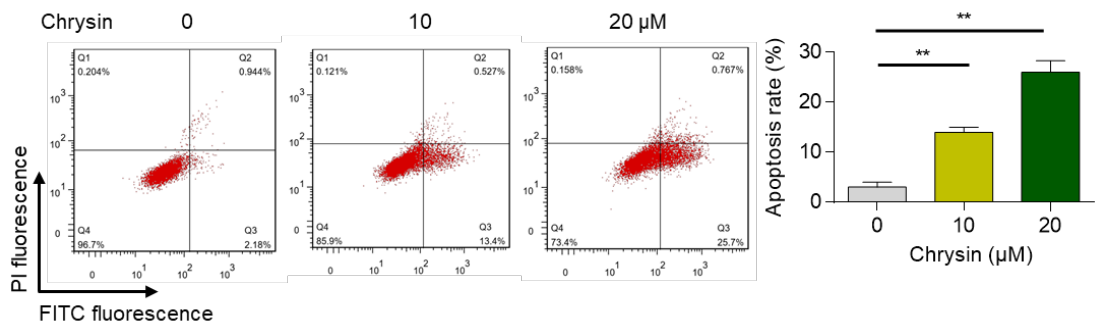

**Figure S3.** Chrysin can induce apoptosis of SW620 cells in a dose-dependent manner.

**Table S1. Unregulated genes in colon cancer.**

| <b>Genes</b> | <b>logFC</b> | <b>PValue</b> | <b>FDR</b> |
|--------------|--------------|---------------|------------|
| KLK6         | 2.905        | 1.54E-87      | 2.20E-84   |
| CST1         | 2.287        | 3.47E-72      | 2.24E-69   |
| FEZF1        | 3.752        | 1.18E-71      | 7.19E-69   |
| SFTA2        | 3.107        | 2.13E-63      | 9.27E-61   |
| KLK8         | 3.770        | 5.27E-62      | 2.03E-59   |
| SPERT        | 3.854        | 5.71E-59      | 1.85E-56   |
| KLK7         | 2.712        | 5.28E-56      | 1.43E-53   |
| COL10A1      | 1.810        | 3.29E-55      | 8.34E-53   |
| NOTUM        | 1.840        | 6.04E-55      | 1.48E-52   |
| MMP7         | 1.575        | 3.39E-54      | 7.99E-52   |
| CASC21       | 2.661        | 4.00E-53      | 8.91E-51   |
| ZIC5         | 3.292        | 7.35E-52      | 1.55E-49   |
| DKK4         | 2.819        | 9.01E-50      | 1.72E-47   |
| KRT80        | 1.421        | 4.71E-49      | 8.51E-47   |
| SOX14        | 3.151        | 4.68E-48      | 8.22E-46   |
| CST2         | 2.528        | 5.68E-48      | 9.90E-46   |
| AC123023     | 2.744        | 4.03E-47      | 6.73E-45   |
| KRT75        | 2.993        | 7.75E-47      | 1.27E-44   |
| SERPINA4     | 2.862        | 4.75E-46      | 7.56E-44   |
| C6orf15      | 3.069        | 5.05E-46      | 7.97E-44   |
| OTX1         | 1.903        | 8.69E-45      | 1.27E-42   |
| IBSP         | 2.917        | 8.38E-44      | 1.14E-41   |
| ESM1         | 1.581        | 1.16E-43      | 1.55E-41   |
| WNT2         | 1.509        | 3.68E-42      | 4.64E-40   |
| KLC3         | 2.477        | 4.59E-42      | 5.72E-40   |
| FGF19        | 2.519        | 6.33E-42      | 7.82E-40   |
| CST4         | 3.508        | 9.63E-42      | 1.16E-39   |
| DMBX1        | 2.763        | 9.22E-41      | 1.05E-38   |
| IGFL4        | 1.909        | 5.41E-40      | 5.92E-38   |
| AC005256     | 3.497        | 1.24E-39      | 1.31E-37   |
| C5orf46      | 3.080        | 1.94E-38      | 1.89E-36   |
| BLACAT1      | 1.520        | 3.00E-38      | 2.88E-36   |
| WNT7B        | 2.188        | 5.98E-38      | 5.73E-36   |
| FOXQ1        | 1.188        | 6.03E-38      | 5.76E-36   |
| IGFL1        | 3.983        | 9.20E-38      | 8.73E-36   |
| CDH3         | 1.077        | 1.66E-37      | 1.57E-35   |
| KRT6A        | 2.076        | 4.61E-37      | 4.25E-35   |
| AKR1C4       | 2.389        | 1.31E-36      | 1.18E-34   |
| ELF5         | 2.549        | 1.35E-36      | 1.20E-34   |
| TCN1         | 1.521        | 1.92E-36      | 1.69E-34   |
| CASC19       | 1.881        | 3.77E-36      | 3.24E-34   |
| AC007128     | 1.998        | 7.36E-36      | 6.19E-34   |

|           |       |          |          |
|-----------|-------|----------|----------|
| FIRRE     | 1.967 | 1.01E-35 | 8.38E-34 |
| EPYC      | 2.515 | 1.14E-35 | 9.33E-34 |
| KRT6B     | 1.521 | 1.63E-35 | 1.32E-33 |
| COL11A1   | 1.185 | 5.22E-35 | 4.15E-33 |
| C8orf74   | 3.745 | 6.87E-35 | 5.38E-33 |
| ADAM20P3  | 3.877 | 7.90E-35 | 6.14E-33 |
| SP8       | 2.498 | 2.44E-33 | 1.77E-31 |
| CLDN2     | 1.014 | 2.91E-33 | 2.10E-31 |
| KRT23     | 1.145 | 3.21E-33 | 2.30E-31 |
| GAD1      | 1.547 | 4.91E-33 | 3.47E-31 |
| MMP13     | 1.947 | 5.30E-33 | 3.74E-31 |
| SLCO1B3   | 1.750 | 6.08E-33 | 4.28E-31 |
| COMP      | 1.287 | 2.39E-32 | 1.64E-30 |
| LY6G6E    | 2.954 | 5.69E-32 | 3.84E-30 |
| KRT16     | 1.972 | 1.01E-31 | 6.73E-30 |
| GBX2      | 2.978 | 1.86E-31 | 1.23E-29 |
| AC007099  | 3.504 | 1.95E-31 | 1.28E-29 |
| MAGEA3    | 3.471 | 2.56E-31 | 1.68E-29 |
| LEMD1     | 1.984 | 3.56E-31 | 2.31E-29 |
| SPRR2D    | 3.037 | 3.91E-31 | 2.52E-29 |
| SPRR1A    | 3.274 | 4.32E-31 | 2.77E-29 |
| AP000697  | 3.704 | 7.11E-31 | 4.55E-29 |
| LY6G6F    | 3.081 | 1.45E-30 | 9.05E-29 |
| C6orf223  | 1.026 | 2.09E-30 | 1.30E-28 |
| C2orf61   | 1.707 | 3.52E-30 | 2.15E-28 |
| LY6G6D    | 1.487 | 6.99E-30 | 4.19E-28 |
| SPRR1B    | 3.032 | 8.47E-30 | 5.03E-28 |
| RAET1L    | 1.637 | 8.77E-30 | 5.18E-28 |
| AMELX     | 2.596 | 4.26E-29 | 2.41E-27 |
| CPNE7     | 1.031 | 4.96E-29 | 2.77E-27 |
| DDN       | 1.313 | 6.33E-29 | 3.50E-27 |
| PRSS56    | 2.941 | 1.24E-28 | 6.74E-27 |
| STRA6     | 1.174 | 1.74E-28 | 9.30E-27 |
| C14orf105 | 2.878 | 2.20E-28 | 1.18E-26 |
| UCN2      | 1.887 | 4.60E-28 | 2.43E-26 |
| PIWIL1    | 1.369 | 1.56E-27 | 8.01E-26 |
| CCAT1     | 1.090 | 1.57E-27 | 8.05E-26 |
| SALL4     | 1.269 | 2.21E-27 | 1.12E-25 |
| PAEP      | 2.395 | 4.96E-27 | 2.43E-25 |
| PDX1      | 1.284 | 6.64E-27 | 3.23E-25 |
| PAH       | 1.528 | 7.97E-27 | 3.85E-25 |
| MCIDAS    | 1.484 | 8.79E-27 | 4.22E-25 |
| FABP6     | 1.124 | 9.63E-27 | 4.59E-25 |
| AC079466  | 2.842 | 1.94E-26 | 9.07E-25 |

|          |       |          |          |
|----------|-------|----------|----------|
| AC142293 | 2.736 | 3.19E-26 | 1.46E-24 |
| EN2      | 1.793 | 3.71E-26 | 1.69E-24 |
| FGB      | 2.103 | 4.94E-26 | 2.23E-24 |
| MSLNL    | 2.773 | 5.51E-26 | 2.47E-24 |
| AC007277 | 1.844 | 6.20E-26 | 2.76E-24 |
| SPRR2A   | 2.606 | 6.64E-26 | 2.94E-24 |
| CRNDE    | 1.187 | 8.01E-26 | 3.53E-24 |
| TCF24    | 2.320 | 8.61E-26 | 3.78E-24 |
| MAGEA6   | 3.056 | 1.63E-25 | 7.00E-24 |
| IRX5     | 1.516 | 3.19E-25 | 1.35E-23 |
| HABP2    | 1.885 | 3.21E-25 | 1.36E-23 |
| OBP2B    | 2.942 | 4.19E-25 | 1.74E-23 |
| TNNI3    | 1.488 | 7.57E-25 | 3.10E-23 |
| HTR1D    | 1.061 | 8.60E-25 | 3.51E-23 |
| KRT17    | 1.009 | 1.10E-24 | 4.45E-23 |
| EPHX4    | 1.052 | 1.34E-24 | 5.43E-23 |
| ZNF280A  | 2.851 | 1.38E-24 | 5.56E-23 |
| PRR9     | 3.240 | 1.71E-24 | 6.78E-23 |
| AC068121 | 2.831 | 4.24E-24 | 1.67E-22 |
| CNTD2    | 1.109 | 4.83E-24 | 1.89E-22 |
| FAM195CP | 2.047 | 7.57E-24 | 2.92E-22 |
| NPSR1    | 1.612 | 1.99E-23 | 7.50E-22 |
| VGLL1    | 2.971 | 2.54E-23 | 9.56E-22 |
| AC018359 | 2.736 | 4.40E-23 | 1.64E-21 |
| GOLGA6L2 | 3.311 | 4.63E-23 | 1.72E-21 |
| PCAT2    | 3.055 | 1.82E-22 | 6.64E-21 |
| ULBP1    | 1.415 | 2.13E-22 | 7.73E-21 |
| ZIC2     | 1.231 | 3.42E-22 | 1.22E-20 |
| C1orf105 | 1.826 | 3.60E-22 | 1.28E-20 |
| CXCL17   | 1.688 | 4.14E-22 | 1.46E-20 |
| DUSP27   | 1.068 | 5.12E-22 | 1.80E-20 |
| C3P1     | 2.718 | 5.73E-22 | 2.01E-20 |
| NCAPD2P1 | 1.832 | 6.07E-22 | 2.12E-20 |
| TPSP2    | 2.655 | 7.56E-22 | 2.63E-20 |
| IL11     | 1.065 | 7.44E-21 | 2.43E-19 |
| FGF20    | 2.007 | 1.14E-20 | 3.69E-19 |
| NEUROG2  | 2.295 | 1.27E-20 | 4.08E-19 |
| LPO      | 1.618 | 1.28E-20 | 4.11E-19 |
| MMP8     | 1.862 | 1.30E-20 | 4.17E-19 |
| GJB4     | 1.048 | 1.51E-20 | 4.82E-19 |
| ERVMER61 | 2.946 | 2.13E-20 | 6.68E-19 |
| SLC26A9  | 1.762 | 2.13E-20 | 6.70E-19 |
| ONECUT3  | 1.605 | 2.18E-20 | 6.84E-19 |
| SMKR1    | 1.150 | 3.27E-20 | 1.01E-18 |

|          |       |          |          |
|----------|-------|----------|----------|
| SPRR3    | 2.278 | 5.99E-20 | 1.82E-18 |
| TLX1     | 1.022 | 6.31E-20 | 1.91E-18 |
| NXPH1    | 2.751 | 8.81E-20 | 2.65E-18 |
| ULBP2    | 1.134 | 9.72E-20 | 2.91E-18 |
| DUSP5P1  | 2.332 | 1.47E-19 | 4.32E-18 |
| SLCO1B1  | 2.758 | 1.90E-19 | 5.54E-18 |
| LY6D     | 1.664 | 2.15E-19 | 6.24E-18 |
| ARHGAP40 | 2.087 | 3.08E-19 | 8.83E-18 |
| MYBPHL   | 2.057 | 3.09E-19 | 8.86E-18 |
| FGA      | 1.544 | 3.37E-19 | 9.64E-18 |
| DSG3     | 1.013 | 4.03E-19 | 1.14E-17 |
| SIX1     | 1.348 | 4.84E-19 | 1.37E-17 |
| MIR31HG  | 2.402 | 5.02E-19 | 1.42E-17 |
| CNN2P4   | 2.385 | 5.23E-19 | 1.47E-17 |
| ASCL5    | 1.156 | 5.45E-19 | 1.53E-17 |
| BTBD16   | 1.160 | 5.67E-19 | 1.59E-17 |
| AC012501 | 2.476 | 1.00E-18 | 2.75E-17 |
| SPATA12  | 1.121 | 1.23E-18 | 3.37E-17 |
| AL162759 | 2.682 | 1.41E-18 | 3.84E-17 |
| PLA2G3   | 1.265 | 2.55E-18 | 6.79E-17 |
| MAGEA12  | 2.696 | 2.60E-18 | 6.92E-17 |
| TRIM71   | 1.878 | 2.80E-18 | 7.44E-17 |
| AC093732 | 1.796 | 3.71E-18 | 9.76E-17 |
| AC093850 | 2.162 | 3.82E-18 | 1.01E-16 |
| SNORA74A | 2.875 | 4.07E-18 | 1.06E-16 |
| AC012512 | 2.077 | 4.24E-18 | 1.11E-16 |
| SERPINB7 | 1.682 | 5.88E-18 | 1.53E-16 |
| PLAC4    | 1.372 | 6.92E-18 | 1.78E-16 |
| AC004593 | 1.570 | 7.08E-18 | 1.82E-16 |
| APELA    | 1.469 | 9.16E-18 | 2.33E-16 |
| NXPH4    | 1.015 | 1.01E-17 | 2.56E-16 |
| KRT83    | 1.838 | 1.02E-17 | 2.58E-16 |
| DMRTA2   | 1.337 | 1.23E-17 | 3.09E-16 |
| AKAP4    | 2.473 | 1.30E-17 | 3.24E-16 |
| AC140076 | 2.023 | 1.51E-17 | 3.75E-16 |
| CPA4     | 1.543 | 1.70E-17 | 4.22E-16 |
| DUSP9    | 1.381 | 1.96E-17 | 4.82E-16 |
| DCSTAMP  | 1.517 | 2.00E-17 | 4.93E-16 |
| SLAMF9   | 1.368 | 2.94E-17 | 7.17E-16 |
| AC133785 | 2.235 | 3.67E-17 | 8.83E-16 |
| AC019100 | 1.962 | 3.76E-17 | 9.02E-16 |
| SBSN     | 1.886 | 3.77E-17 | 9.03E-16 |
| PPBP     | 1.123 | 4.96E-17 | 1.18E-15 |
| CYP4F23P | 1.476 | 5.40E-17 | 1.28E-15 |

|           |       |          |          |
|-----------|-------|----------|----------|
| LUCAT1    | 1.342 | 8.28E-17 | 1.95E-15 |
| DMRT3     | 1.890 | 9.20E-17 | 2.16E-15 |
| MIR3189   | 1.334 | 9.94E-17 | 2.33E-15 |
| FAM150A   | 1.024 | 1.47E-16 | 3.41E-15 |
| SNORA71A  | 1.303 | 1.49E-16 | 3.45E-15 |
| HOXC11    | 1.442 | 1.55E-16 | 3.57E-15 |
| S100A11P1 | 2.353 | 2.43E-16 | 5.55E-15 |
| PTF1A     | 2.578 | 2.99E-16 | 6.79E-15 |
| MMP20     | 1.915 | 3.21E-16 | 7.25E-15 |
| BAAT      | 1.451 | 3.47E-16 | 7.82E-15 |
| CCAT2     | 1.973 | 7.52E-16 | 1.65E-14 |
| APOA2     | 1.731 | 8.72E-16 | 1.91E-14 |
| SLC22A11  | 1.027 | 1.10E-15 | 2.40E-14 |
| CHST4     | 1.108 | 1.17E-15 | 2.53E-14 |
| AC004988  | 1.653 | 1.41E-15 | 3.04E-14 |
| SPATA20P1 | 2.221 | 2.23E-15 | 4.75E-14 |
| KDELCP1   | 1.545 | 2.65E-15 | 5.62E-14 |
| PGC       | 1.109 | 3.00E-15 | 6.31E-14 |
| CLDN16    | 1.053 | 4.07E-15 | 8.45E-14 |
| XIRP1     | 1.191 | 4.13E-15 | 8.57E-14 |
| WFDC10A   | 2.036 | 5.41E-15 | 1.11E-13 |
| IFNWP19   | 2.151 | 5.51E-15 | 1.12E-13 |
| DUXAP10   | 1.619 | 5.91E-15 | 1.20E-13 |
| KRT6C     | 2.151 | 8.02E-15 | 1.61E-13 |
| TMEM40    | 1.615 | 8.78E-15 | 1.76E-13 |
| KRT87P    | 1.811 | 1.00E-14 | 1.99E-13 |
| AHSG      | 1.581 | 1.15E-14 | 2.29E-13 |
| PRSS41    | 1.553 | 1.25E-14 | 2.47E-13 |
| RHBG      | 1.778 | 1.67E-14 | 3.24E-13 |
| RNA5SP18  | 2.390 | 1.67E-14 | 3.24E-13 |
| CYCSP6    | 1.275 | 2.48E-14 | 4.74E-13 |
| PRDM12    | 1.223 | 2.74E-14 | 5.22E-13 |
| IFITM5    | 2.192 | 2.85E-14 | 5.43E-13 |
| BBOX1     | 1.123 | 3.05E-14 | 5.79E-13 |
| PGLYRP3   | 2.181 | 3.53E-14 | 6.64E-13 |
| CSF2      | 1.151 | 3.98E-14 | 7.43E-13 |
| RAET1K    | 1.331 | 4.35E-14 | 8.08E-13 |
| BHLHA9    | 2.133 | 4.38E-14 | 8.13E-13 |
| SNORD12B  | 1.343 | 4.50E-14 | 8.35E-13 |
| SH2D5     | 1.230 | 5.46E-14 | 1.01E-12 |
| IFNE      | 2.188 | 6.26E-14 | 1.15E-12 |
| CSTL1     | 1.586 | 7.13E-14 | 1.30E-12 |
| SNORA71D  | 2.183 | 7.23E-14 | 1.32E-12 |
| AC064834  | 1.800 | 7.52E-14 | 1.37E-12 |

|            |       |          |          |
|------------|-------|----------|----------|
| RPS18P1    | 1.945 | 7.57E-14 | 1.38E-12 |
| MAGEB17    | 1.137 | 8.14E-14 | 1.47E-12 |
| SNORD12C   | 2.028 | 8.35E-14 | 1.51E-12 |
| ATP6V0A4   | 1.695 | 9.72E-14 | 1.75E-12 |
| AC005264   | 1.787 | 1.04E-13 | 1.86E-12 |
| PTTG3P     | 1.953 | 1.14E-13 | 2.03E-12 |
| FOXI3      | 2.292 | 1.17E-13 | 2.09E-12 |
| PCMTD1P3   | 1.928 | 1.27E-13 | 2.24E-12 |
| IGFL1P1    | 1.994 | 1.97E-13 | 3.43E-12 |
| CALCA      | 1.184 | 2.32E-13 | 4.02E-12 |
| OFCC1      | 1.887 | 2.79E-13 | 4.80E-12 |
| AC105399   | 2.090 | 2.83E-13 | 4.86E-12 |
| AL589743   | 1.422 | 3.26E-13 | 5.58E-12 |
| VTCN1      | 1.414 | 3.26E-13 | 5.58E-12 |
| AC002331   | 1.561 | 3.58E-13 | 6.13E-12 |
| TDGF1P3    | 1.651 | 3.64E-13 | 6.21E-12 |
| SNORD48    | 1.886 | 4.01E-13 | 6.82E-12 |
| GSDMC      | 1.132 | 4.29E-13 | 7.29E-12 |
| RPL37AP8   | 1.163 | 4.62E-13 | 7.84E-12 |
| TMEM75     | 1.548 | 6.48E-13 | 1.09E-11 |
| IL36RN     | 1.804 | 8.41E-13 | 1.40E-11 |
| SPDYC      | 1.050 | 9.32E-13 | 1.55E-11 |
| BEST3      | 1.318 | 1.21E-12 | 1.99E-11 |
| AFP        | 1.385 | 1.50E-12 | 2.46E-11 |
| SNORA71C   | 1.088 | 1.63E-12 | 2.66E-11 |
| SEC14L4    | 1.291 | 1.70E-12 | 2.76E-11 |
| F2         | 1.157 | 1.79E-12 | 2.91E-11 |
| OACYLP     | 1.136 | 1.84E-12 | 2.98E-11 |
| HSPE1P5    | 1.906 | 2.40E-12 | 3.86E-11 |
| PPP1R14BP2 | 1.242 | 2.41E-12 | 3.86E-11 |
| RPL18P13   | 1.143 | 3.99E-12 | 6.25E-11 |
| ALOXE3     | 1.243 | 4.02E-12 | 6.29E-11 |
| GAST       | 2.035 | 4.13E-12 | 6.46E-11 |
| DIRC1      | 1.984 | 4.82E-12 | 7.49E-11 |
| CAMKV      | 1.030 | 7.10E-12 | 1.09E-10 |
| MAGEA11    | 1.378 | 7.78E-12 | 1.18E-10 |
| TECRP2     | 1.617 | 8.32E-12 | 1.26E-10 |
| RPL35AP21  | 1.519 | 9.20E-12 | 1.39E-10 |
| TAS2R38    | 1.127 | 9.30E-12 | 1.40E-10 |
| PRDM13     | 1.292 | 1.35E-11 | 2.00E-10 |
| RFX8       | 1.128 | 2.39E-11 | 3.48E-10 |
| SNRPF1     | 1.518 | 2.55E-11 | 3.70E-10 |
| MAGOH3P    | 1.538 | 2.63E-11 | 3.80E-10 |
| NAT16      | 1.324 | 3.57E-11 | 5.09E-10 |

|           |       |          |          |
|-----------|-------|----------|----------|
| TPT1P12   | 1.262 | 3.91E-11 | 5.55E-10 |
| FGG       | 1.787 | 4.18E-11 | 5.91E-10 |
| RPS3AP46  | 1.465 | 4.34E-11 | 6.13E-10 |
| ORM1      | 1.269 | 4.38E-11 | 6.18E-10 |
| S100A7    | 1.698 | 4.51E-11 | 6.35E-10 |
| CSAG1     | 1.711 | 4.84E-11 | 6.79E-10 |
| AC009362  | 1.070 | 5.03E-11 | 7.04E-10 |
| MIR7111   | 1.214 | 5.74E-11 | 7.98E-10 |
| HULC      | 1.595 | 6.41E-11 | 8.87E-10 |
| SMCO2     | 1.081 | 6.42E-11 | 8.87E-10 |
| AC018641  | 1.325 | 7.08E-11 | 9.73E-10 |
| METTLL11B | 1.879 | 7.20E-11 | 9.88E-10 |
| SAA4      | 1.666 | 7.76E-11 | 1.06E-09 |
| HBE1      | 1.652 | 7.97E-11 | 1.09E-09 |
| CST5      | 1.906 | 9.07E-11 | 1.23E-09 |
| AC009410  | 1.212 | 9.91E-11 | 1.34E-09 |
| AC104297  | 1.093 | 1.14E-10 | 1.53E-09 |
| MIOX      | 1.116 | 1.15E-10 | 1.54E-09 |
| IL17C     | 1.084 | 1.21E-10 | 1.62E-09 |
| AC112721  | 1.666 | 1.50E-10 | 1.99E-09 |
| SCDP1     | 1.332 | 1.52E-10 | 2.02E-09 |
| GRK1      | 1.073 | 1.66E-10 | 2.19E-09 |
| SNORA23   | 1.517 | 1.66E-10 | 2.19E-09 |
| LRRN4     | 1.017 | 2.21E-10 | 2.89E-09 |
| ATP5G1P6  | 1.667 | 2.71E-10 | 3.51E-09 |
| SNORD88A  | 1.611 | 3.15E-10 | 4.05E-09 |
| HIST1H2AH | 1.286 | 3.23E-10 | 4.14E-09 |
| UBE2SP2   | 1.032 | 3.28E-10 | 4.19E-09 |
| SLCO1A2   | 1.225 | 3.39E-10 | 4.32E-09 |
| C9orf57   | 1.865 | 3.52E-10 | 4.48E-09 |
| SNORA80B  | 1.370 | 3.63E-10 | 4.61E-09 |
| SNORD72   | 1.648 | 3.63E-10 | 4.61E-09 |
| RPL36P16  | 1.415 | 3.98E-10 | 5.03E-09 |
| RYKP1     | 1.129 | 4.30E-10 | 5.42E-09 |
| AQP2      | 1.740 | 4.58E-10 | 5.76E-09 |
| RPS24P16  | 1.436 | 4.77E-10 | 5.98E-09 |
| SCARNA5   | 1.265 | 5.63E-10 | 7.03E-09 |
| TMEM249   | 1.019 | 5.96E-10 | 7.42E-09 |
| AC118754  | 1.378 | 6.44E-10 | 7.98E-09 |
| FAR2P1    | 1.176 | 6.59E-10 | 8.14E-09 |
| PCAT14    | 1.042 | 7.25E-10 | 8.93E-09 |
| CLLU1     | 1.576 | 7.56E-10 | 9.29E-09 |
| HIST1H4B  | 1.317 | 8.18E-10 | 1.00E-08 |
| HCRT      | 1.408 | 8.37E-10 | 1.02E-08 |



|           |       |          |          |
|-----------|-------|----------|----------|
| GTF2F2P1  | 1.359 | 8.50E-10 | 1.04E-08 |
| AKR1C8P   | 1.598 | 1.03E-09 | 1.25E-08 |
| UPK2      | 1.161 | 1.19E-09 | 1.43E-08 |
| POU3F2    | 1.286 | 1.36E-09 | 1.63E-08 |
| WASIR2    | 1.196 | 1.55E-09 | 1.85E-08 |
| GNGT1     | 1.067 | 1.58E-09 | 1.88E-08 |
| AC144450  | 1.183 | 1.70E-09 | 2.01E-08 |
| HIST1H3J  | 1.115 | 2.42E-09 | 2.82E-08 |
| AC092573  | 1.012 | 2.45E-09 | 2.85E-08 |
| DDX3P1    | 1.166 | 2.73E-09 | 3.17E-08 |
| RPL7AP4   | 1.135 | 2.79E-09 | 3.23E-08 |
| PRDX2P4   | 1.295 | 2.94E-09 | 3.40E-08 |
| IZUMO2    | 1.065 | 3.39E-09 | 3.89E-08 |
| HIST1H2AB | 1.418 | 3.41E-09 | 3.91E-08 |
| PDCD5P1   | 1.254 | 3.57E-09 | 4.09E-08 |
| EIF3IP1   | 1.399 | 4.29E-09 | 4.87E-08 |
| MRPL40P1  | 1.652 | 4.41E-09 | 5.01E-08 |
| HIST1H2BI | 1.453 | 4.73E-09 | 5.34E-08 |
| AC013439  | 1.270 | 4.77E-09 | 5.38E-08 |
| TCAM1P    | 1.330 | 5.05E-09 | 5.68E-08 |
| SULT1C2P1 | 1.246 | 5.14E-09 | 5.77E-08 |
| LRP2      | 1.281 | 5.58E-09 | 6.21E-08 |
| HES7      | 1.213 | 6.94E-09 | 7.63E-08 |
| PPEF1     | 1.208 | 1.00E-08 | 1.08E-07 |
| ERHP1     | 1.178 | 1.30E-08 | 1.38E-07 |
| HIST1H3I  | 1.334 | 1.67E-08 | 1.75E-07 |
| AC105009  | 1.517 | 1.72E-08 | 1.80E-07 |
| RN7SL28P  | 1.475 | 1.73E-08 | 1.81E-07 |
| HSPD1P2   | 1.395 | 2.40E-08 | 2.49E-07 |
| MIR6797   | 1.282 | 3.02E-08 | 3.09E-07 |
| TEX19     | 1.130 | 3.42E-08 | 3.48E-07 |
| FGF8      | 1.300 | 3.49E-08 | 3.54E-07 |
| AC005592  | 1.153 | 3.92E-08 | 3.96E-07 |
| C15orf54  | 1.407 | 4.02E-08 | 4.04E-07 |
| UROC1     | 1.399 | 4.02E-08 | 4.04E-07 |
| AL022326  | 1.154 | 4.16E-08 | 4.18E-07 |
| RPL31P2   | 1.203 | 4.25E-08 | 4.26E-07 |
| AC079145  | 1.043 | 4.41E-08 | 4.41E-07 |
| POLD2P1   | 1.263 | 4.78E-08 | 4.76E-07 |
| IFNL3P1   | 1.090 | 5.09E-08 | 5.03E-07 |
| PCBP2P1   | 1.262 | 5.86E-08 | 5.76E-07 |
| PKMP5     | 1.045 | 5.92E-08 | 5.81E-07 |
| BHMG1     | 1.433 | 6.03E-08 | 5.91E-07 |
| RPS8P3    | 1.249 | 6.49E-08 | 6.32E-07 |

|             |       |          |          |
|-------------|-------|----------|----------|
| KLK5        | 1.440 | 7.65E-08 | 7.38E-07 |
| ANKRD33     | 1.253 | 8.66E-08 | 8.29E-07 |
| SEPHS1P4    | 1.160 | 9.99E-08 | 9.49E-07 |
| EPHA8       | 1.343 | 1.06E-07 | 1.00E-06 |
| EEF1DP5     | 1.193 | 1.08E-07 | 1.02E-06 |
| IGFL3       | 1.078 | 1.09E-07 | 1.03E-06 |
| ANKRD1      | 1.091 | 1.31E-07 | 1.22E-06 |
| ARF1P2      | 1.296 | 1.48E-07 | 1.37E-06 |
| SNRPD2P1    | 1.238 | 1.86E-07 | 1.71E-06 |
| FDSP8       | 1.166 | 1.88E-07 | 1.72E-06 |
| AC064850    | 1.009 | 2.15E-07 | 1.96E-06 |
| SNRPCP2     | 1.033 | 2.21E-07 | 2.01E-06 |
| AP000577    | 1.258 | 2.22E-07 | 2.01E-06 |
| ANKRD20A19P | 1.360 | 2.31E-07 | 2.09E-06 |
| SUPT4H1P    | 1.412 | 2.63E-07 | 2.36E-06 |
| AC092415    | 1.410 | 2.86E-07 | 2.56E-06 |
| SLC25A24P1  | 1.157 | 2.90E-07 | 2.59E-06 |
| OBP2A       | 1.301 | 3.11E-07 | 2.77E-06 |
| RPL37P1     | 1.267 | 3.56E-07 | 3.14E-06 |
| SERPINH1P1  | 1.163 | 4.45E-07 | 3.88E-06 |
| MUCL1       | 1.006 | 4.72E-07 | 4.10E-06 |
| TREML3P     | 1.194 | 5.35E-07 | 4.62E-06 |
| AC012066    | 1.003 | 5.87E-07 | 5.04E-06 |
| ILF2P1      | 1.167 | 6.32E-07 | 5.41E-06 |
| AC019129    | 1.001 | 6.73E-07 | 5.74E-06 |
| MPP4        | 1.051 | 7.88E-07 | 6.66E-06 |
| AC007790    | 1.209 | 8.94E-07 | 7.50E-06 |
| RNU4ATAC    | 1.056 | 9.05E-07 | 7.58E-06 |
| EN1         | 1.215 | 9.58E-07 | 8.00E-06 |
| FDSP5       | 1.240 | 9.72E-07 | 8.11E-06 |
| KAAG1       | 1.179 | 1.06E-06 | 8.83E-06 |
| FKBP4P6     | 1.268 | 1.11E-06 | 9.15E-06 |
| PRDX2P1     | 1.146 | 1.13E-06 | 9.30E-06 |
| EIF5AP3     | 1.184 | 1.22E-06 | 1.01E-05 |
| AC005102    | 1.098 | 1.57E-06 | 1.27E-05 |
| HIST2H2AB   | 1.145 | 1.61E-06 | 1.30E-05 |
| RPS7P15     | 1.075 | 1.76E-06 | 1.41E-05 |
| NUFIP1P     | 1.216 | 1.97E-06 | 1.57E-05 |
| AC007750    | 1.195 | 1.97E-06 | 1.57E-05 |
| GCM1        | 1.023 | 2.01E-06 | 1.59E-05 |
| EPGN        | 1.288 | 2.03E-06 | 1.61E-05 |
| CHRNA6      | 1.024 | 2.10E-06 | 1.66E-05 |
| HBQ1        | 1.014 | 2.20E-06 | 1.74E-05 |
| ACTBL2      | 1.209 | 2.44E-06 | 1.91E-05 |

|           |       |          |          |
|-----------|-------|----------|----------|
| PMCH      | 1.191 | 2.71E-06 | 2.10E-05 |
| MIR6835   | 1.041 | 2.82E-06 | 2.18E-05 |
| SLED1     | 1.081 | 2.84E-06 | 2.19E-05 |
| HNRNPH1P3 | 1.180 | 3.55E-06 | 2.70E-05 |
| KLF2P1    | 1.186 | 4.39E-06 | 3.30E-05 |
| OR7E85P   | 1.176 | 4.40E-06 | 3.31E-05 |
| AC073326  | 1.208 | 5.15E-06 | 3.82E-05 |
| AC024995  | 1.100 | 5.32E-06 | 3.93E-05 |
| IFIT1P1   | 1.166 | 5.60E-06 | 4.12E-05 |
| ZDHHC4P1  | 1.114 | 6.46E-06 | 4.70E-05 |
| PARP1P1   | 1.045 | 6.62E-06 | 4.82E-05 |
| TMEM213   | 1.012 | 6.83E-06 | 4.96E-05 |
| GPRC6A    | 1.004 | 7.03E-06 | 5.09E-05 |
| GAPDHP67  | 1.019 | 7.09E-06 | 5.13E-05 |
| SCARNA8   | 1.111 | 7.29E-06 | 5.27E-05 |
| RPL7P33   | 1.102 | 8.08E-06 | 5.79E-05 |
| SIX3      | 1.185 | 8.28E-06 | 5.92E-05 |
| SNORD1B   | 1.089 | 1.55E-05 | 0.000107 |
| EGOT      | 1.099 | 1.74E-05 | 0.000119 |
| SEPW1P    | 1.063 | 1.81E-05 | 0.000124 |
| CD300LD   | 1.143 | 1.86E-05 | 0.000127 |
| AC012354  | 1.021 | 3.15E-05 | 0.000207 |
| RNY1      | 1.030 | 3.48E-05 | 0.000226 |
| AC023672  | 1.042 | 3.82E-05 | 0.000247 |
| NPM1P40   | 1.010 | 5.37E-05 | 0.000337 |
| IRG1      | 1.006 | 0.000113 | 0.000664 |

**Table S2. Downregulated genes in colon cancer.**

| <b>Genes</b> | <b>logFC</b> | <b>PValue</b> | <b>FDR</b> |
|--------------|--------------|---------------|------------|
| OTOP2        | -2.658       | 2.42E-179     | 4.84E-175  |
| CLDN8        | -2.102       | 1.11E-110     | 1.11E-106  |
| MYOC         | -2.397       | 2.53E-109     | 1.69E-105  |
| CD177P1      | -2.668       | 4.33E-109     | 2.17E-105  |
| TMIGD1       | -1.849       | 5.71E-107     | 2.29E-103  |
| LGI1         | -2.586       | 7.85E-103     | 2.62E-99   |
| GUCA2B       | -1.752       | 5.08E-96      | 1.45E-92   |
| SLC17A8      | -2.557       | 1.87E-95      | 4.67E-92   |
| PCSK2        | -2.198       | 7.00E-94      | 1.56E-90   |
| DAO          | -2.296       | 2.98E-90      | 5.96E-87   |
| PYY          | -1.719       | 2.76E-89      | 5.02E-86   |
| MS4A10       | -2.597       | 7.42E-88      | 1.24E-84   |
| GCG          | -1.800       | 1.17E-87      | 1.80E-84   |
| RERGL        | -2.144       | 5.87E-87      | 7.84E-84   |
| CA1          | -1.459       | 7.26E-87      | 9.09E-84   |

|           |        |          |          |
|-----------|--------|----------|----------|
| SLC30A10  | -1.886 | 2.17E-86 | 2.56E-83 |
| NPY2R     | -2.466 | 8.85E-85 | 9.85E-82 |
| NGB       | -2.563 | 3.14E-84 | 3.32E-81 |
| PHOX2B    | -2.284 | 1.80E-83 | 1.80E-80 |
| INSL5     | -2.149 | 3.75E-83 | 3.58E-80 |
| RN7SKP127 | -2.595 | 8.55E-83 | 7.78E-80 |
| HSD3B2    | -1.951 | 2.34E-81 | 2.04E-78 |
| SST       | -1.860 | 3.07E-80 | 2.56E-77 |
| AQP8      | -1.364 | 1.86E-76 | 1.49E-73 |
| VSTM2A    | -2.338 | 3.74E-76 | 2.88E-73 |
| PMP2      | -2.251 | 2.04E-74 | 1.51E-71 |
| CMTM5     | -2.347 | 1.94E-73 | 1.39E-70 |
| KHDRBS2   | -2.403 | 9.27E-73 | 6.40E-70 |
| FEV       | -2.039 | 2.29E-72 | 1.53E-69 |
| FAM180B   | -2.385 | 3.82E-72 | 2.39E-69 |
| BRINP3    | -1.714 | 4.01E-71 | 2.36E-68 |
| NRXN1     | -1.763 | 1.26E-70 | 7.23E-68 |
| FAM135B   | -1.930 | 7.83E-70 | 4.36E-67 |
| STMN4     | -2.170 | 1.34E-69 | 7.24E-67 |
| C14orf180 | -2.377 | 1.52E-68 | 8.00E-66 |
| SGCG      | -2.228 | 5.32E-68 | 2.73E-65 |
| ASB5      | -2.155 | 1.47E-66 | 7.37E-64 |
| TMEFF2    | -2.131 | 1.94E-66 | 9.50E-64 |
| ANGPTL7   | -1.886 | 2.79E-66 | 1.33E-63 |
| PLP1      | -1.536 | 4.65E-66 | 2.17E-63 |
| SCGN      | -1.528 | 6.41E-65 | 2.92E-62 |
| CMA1      | -1.840 | 1.58E-63 | 7.02E-61 |
| SLC5A7    | -2.080 | 2.22E-63 | 9.46E-61 |
| SLC7A14   | -1.942 | 2.79E-63 | 1.16E-60 |
| SPOCK3    | -2.109 | 1.38E-62 | 5.64E-60 |
| SLC6A19   | -1.471 | 2.42E-62 | 9.58E-60 |
| AC007182  | -1.737 | 2.44E-62 | 9.58E-60 |
| SLITRK3   | -1.878 | 8.03E-62 | 3.04E-59 |
| NEUROD1   | -1.905 | 1.33E-61 | 4.92E-59 |
| ABCB11    | -1.738 | 1.37E-60 | 4.98E-58 |
| CA7       | -1.276 | 1.53E-60 | 5.48E-58 |
| MS4A12    | -1.248 | 1.74E-60 | 6.13E-58 |
| SYT10     | -2.233 | 8.37E-60 | 2.89E-57 |
| AC106869  | -2.021 | 1.07E-59 | 3.63E-57 |
| SEMA3E    | -1.651 | 1.14E-59 | 3.81E-57 |
| BMP3      | -1.338 | 2.25E-59 | 7.38E-57 |
| GALR1     | -2.207 | 1.10E-58 | 3.50E-56 |
| XKR4      | -1.757 | 2.65E-58 | 8.29E-56 |
| TCEAL5    | -2.136 | 3.40E-58 | 1.05E-55 |

|           |        |          |          |
|-----------|--------|----------|----------|
| GABRG2    | -2.150 | 6.72E-58 | 2.04E-55 |
| CHST9     | -2.157 | 8.18E-58 | 2.44E-55 |
| SCN7A     | -1.425 | 2.55E-57 | 7.52E-55 |
| PI16      | -1.411 | 2.98E-57 | 8.65E-55 |
| CLCA4     | -1.129 | 7.32E-57 | 2.09E-54 |
| P2RX2     | -1.960 | 2.14E-56 | 6.04E-54 |
| ASTN1     | -1.843 | 2.40E-56 | 6.67E-54 |
| RIMS4     | -1.779 | 3.37E-56 | 9.26E-54 |
| TUSC5     | -1.942 | 1.01E-55 | 2.71E-53 |
| CDH19     | -1.552 | 1.16E-55 | 3.06E-53 |
| MGAT4C    | -2.049 | 1.60E-55 | 4.17E-53 |
| ST8SIA3   | -2.123 | 2.65E-55 | 6.81E-53 |
| PRIMA1    | -1.411 | 3.53E-55 | 8.84E-53 |
| HS3ST6    | -2.170 | 4.09E-55 | 1.01E-52 |
| PHOX2A    | -2.003 | 9.40E-55 | 2.27E-52 |
| HTR3C     | -2.078 | 1.07E-54 | 2.56E-52 |
| C2orf40   | -1.530 | 4.40E-54 | 1.02E-51 |
| NPY6R     | -1.507 | 4.94E-54 | 1.14E-51 |
| NPY       | -1.917 | 1.74E-53 | 3.97E-51 |
| SYT4      | -1.760 | 2.53E-53 | 5.68E-51 |
| PIRT      | -1.533 | 7.48E-53 | 1.65E-50 |
| RXRG      | -1.672 | 1.55E-52 | 3.37E-50 |
| CD177     | -1.075 | 3.48E-52 | 7.50E-50 |
| CA4       | -1.118 | 5.79E-52 | 1.23E-49 |
| HMP19     | -1.512 | 7.69E-52 | 1.61E-49 |
| MORN5     | -1.890 | 8.01E-52 | 1.66E-49 |
| MUSK      | -1.661 | 1.50E-51 | 3.07E-49 |
| BEST4     | -1.182 | 1.63E-51 | 3.29E-49 |
| CHGA      | -1.119 | 1.36E-50 | 2.72E-48 |
| ADCYAP1R1 | -1.551 | 1.38E-50 | 2.73E-48 |
| FIGF      | -1.537 | 1.88E-50 | 3.70E-48 |
| PCAT18    | -2.089 | 2.31E-50 | 4.50E-48 |
| GPM6A     | -1.419 | 3.34E-50 | 6.44E-48 |
| OLFM3     | -1.880 | 9.25E-50 | 1.75E-47 |
| MYOT      | -1.585 | 1.29E-49 | 2.42E-47 |
| ELANE     | -1.837 | 1.38E-49 | 2.56E-47 |
| TCEAL2    | -1.547 | 2.11E-49 | 3.87E-47 |
| CNTN2     | -1.541 | 4.47E-49 | 8.15E-47 |
| LMX1A     | -1.870 | 6.18E-49 | 1.10E-46 |
| DPP6      | -1.451 | 1.27E-48 | 2.25E-46 |
| SFRP5     | -1.557 | 7.07E-48 | 1.22E-45 |
| ZG16      | -1.012 | 9.04E-48 | 1.55E-45 |
| AC074363  | -2.029 | 2.69E-47 | 4.57E-45 |
| GBA3      | -1.271 | 3.38E-47 | 5.69E-45 |

|           |        |          |          |
|-----------|--------|----------|----------|
| RSPO2     | -1.365 | 5.31E-47 | 8.79E-45 |
| ADH1B     | -1.108 | 2.27E-46 | 3.70E-44 |
| CHRM2     | -1.418 | 3.30E-46 | 5.32E-44 |
| CASR      | -1.963 | 3.49E-46 | 5.60E-44 |
| AMPD1     | -1.399 | 7.39E-46 | 1.16E-43 |
| ATP1A2    | -1.193 | 1.06E-45 | 1.65E-43 |
| B4GALNT2  | -1.092 | 1.21E-45 | 1.87E-43 |
| CTNND2    | -1.517 | 2.56E-45 | 3.92E-43 |
| SERPINA9  | -1.928 | 3.88E-45 | 5.88E-43 |
| CD300LG   | -1.744 | 5.00E-45 | 7.54E-43 |
| SLC18A3   | -1.990 | 6.13E-45 | 9.16E-43 |
| CLVS2     | -1.883 | 8.04E-45 | 1.19E-42 |
| CWH43     | -1.173 | 8.23E-45 | 1.21E-42 |
| ABCB5     | -1.720 | 8.85E-45 | 1.28E-42 |
| UGT1A8    | -1.231 | 1.05E-44 | 1.51E-42 |
| ELAVL3    | -1.810 | 1.24E-44 | 1.77E-42 |
| ABCA8     | -1.132 | 1.35E-44 | 1.92E-42 |
| NRSN1     | -1.884 | 2.64E-44 | 3.73E-42 |
| KIAA2022  | -1.477 | 3.48E-44 | 4.85E-42 |
| AL928768  | -1.519 | 3.49E-44 | 4.85E-42 |
| DMRTA1    | -1.439 | 4.07E-44 | 5.62E-42 |
| CNGB1     | -1.692 | 4.50E-44 | 6.18E-42 |
| WISP2     | -1.244 | 8.74E-44 | 1.18E-41 |
| SCNN1G    | -1.417 | 1.74E-43 | 2.33E-41 |
| SFRP1     | -1.104 | 1.83E-43 | 2.43E-41 |
| AC004947  | -1.760 | 5.45E-43 | 7.18E-41 |
| SNAP91    | -1.566 | 6.23E-43 | 8.15E-41 |
| KRT9      | -1.940 | 8.30E-43 | 1.08E-40 |
| MAB21L1   | -1.605 | 1.04E-42 | 1.35E-40 |
| BCHE      | -1.229 | 1.30E-42 | 1.67E-40 |
| GSG1L     | -1.870 | 2.22E-42 | 2.83E-40 |
| ATCAY     | -1.571 | 3.56E-42 | 4.51E-40 |
| CASQ2     | -1.225 | 3.84E-42 | 4.80E-40 |
| PLCXD3    | -1.513 | 6.88E-42 | 8.43E-40 |
| SLC27A6   | -1.627 | 6.90E-42 | 8.43E-40 |
| OGN       | -1.122 | 8.12E-42 | 9.86E-40 |
| ANGPTL5   | -1.969 | 1.02E-41 | 1.23E-39 |
| NUS1P2    | -1.964 | 1.17E-41 | 1.39E-39 |
| TAGLN3    | -1.507 | 1.53E-41 | 1.81E-39 |
| BAI3      | -1.430 | 1.60E-41 | 1.88E-39 |
| ATP2B3    | -1.870 | 2.87E-41 | 3.37E-39 |
| UG0898H09 | -1.571 | 3.78E-41 | 4.40E-39 |
| FRRS1L    | -1.486 | 6.83E-41 | 7.90E-39 |
| LHFPL4    | -1.510 | 7.46E-41 | 8.59E-39 |

|          |        |          |          |
|----------|--------|----------|----------|
| CADM3    | -1.299 | 8.34E-41 | 9.55E-39 |
| NEFM     | -1.498 | 1.12E-40 | 1.26E-38 |
| GPR15    | -1.227 | 1.97E-40 | 2.22E-38 |
| BEST2    | -1.124 | 2.51E-40 | 2.80E-38 |
| NEFL     | -1.295 | 3.41E-40 | 3.80E-38 |
| PKHD1L1  | -1.320 | 3.50E-40 | 3.87E-38 |
| CNR1     | -1.244 | 5.33E-40 | 5.87E-38 |
| SLC30A8  | -1.888 | 5.65E-40 | 6.15E-38 |
| SORCS1   | -1.239 | 1.05E-39 | 1.14E-37 |
| EPHA6    | -1.702 | 1.11E-39 | 1.19E-37 |
| SPIB     | -1.030 | 1.23E-39 | 1.31E-37 |
| SLC4A10  | -1.270 | 1.82E-39 | 1.92E-37 |
| CNGA3    | -1.380 | 2.33E-39 | 2.43E-37 |
| CTNNA3   | -1.390 | 3.10E-39 | 3.21E-37 |
| RASGEF1C | -1.583 | 3.55E-39 | 3.67E-37 |
| MEP1B    | -1.165 | 4.36E-39 | 4.48E-37 |
| FOXO3    | -1.657 | 5.20E-39 | 5.32E-37 |
| SCN2B    | -1.337 | 6.12E-39 | 6.22E-37 |
| PRPH     | -1.209 | 7.88E-39 | 7.98E-37 |
| NAP1L2   | -1.264 | 9.43E-39 | 9.49E-37 |
| COL19A1  | -1.659 | 1.24E-38 | 1.24E-36 |
| FMN2     | -1.319 | 1.35E-38 | 1.35E-36 |
| MAPK4    | -1.341 | 1.42E-38 | 1.41E-36 |
| P2RY4    | -1.586 | 1.50E-38 | 1.48E-36 |
| SLAMF6P1 | -1.409 | 1.62E-38 | 1.60E-36 |
| CTSG     | -1.207 | 1.70E-38 | 1.67E-36 |
| SCN11A   | -1.373 | 2.35E-38 | 2.27E-36 |
| SPINK2   | -1.389 | 2.03E-37 | 1.91E-35 |
| PCDH10   | -1.495 | 3.03E-37 | 2.84E-35 |
| KCTD4    | -1.534 | 3.33E-37 | 3.11E-35 |
| HSPB3    | -1.435 | 4.27E-37 | 3.96E-35 |
| HRK      | -1.520 | 5.66E-37 | 5.20E-35 |
| NR1H4    | -1.164 | 7.46E-37 | 6.82E-35 |
| LCN6     | -1.660 | 8.99E-37 | 8.18E-35 |
| LONRF2   | -1.243 | 9.29E-37 | 8.42E-35 |
| ANGPTL1  | -1.095 | 1.15E-36 | 1.04E-34 |
| DPYSL5   | -1.547 | 1.35E-36 | 1.20E-34 |
| AGTR1    | -1.254 | 1.44E-36 | 1.28E-34 |
| SLCO4C1  | -1.231 | 2.01E-36 | 1.77E-34 |
| KCNB1    | -1.270 | 2.17E-36 | 1.90E-34 |
| NPTX1    | -1.160 | 2.26E-36 | 1.97E-34 |
| HAND1    | -1.325 | 2.31E-36 | 2.00E-34 |
| SCG3     | -1.266 | 3.50E-36 | 3.02E-34 |
| PTPRZ1   | -1.294 | 3.81E-36 | 3.26E-34 |

|           |        |          |          |
|-----------|--------|----------|----------|
| SLC6A15   | -1.576 | 5.00E-36 | 4.26E-34 |
| CA10      | -1.585 | 5.22E-36 | 4.43E-34 |
| TMEM179   | -1.389 | 6.35E-36 | 5.37E-34 |
| IGLJ1     | -1.825 | 7.70E-36 | 6.45E-34 |
| ADH1A     | -1.844 | 8.50E-36 | 7.10E-34 |
| C20orf166 | -1.335 | 9.61E-36 | 7.98E-34 |
| HMX2      | -1.764 | 1.08E-35 | 8.89E-34 |
| KCNA1     | -1.737 | 1.32E-35 | 1.08E-33 |
| ASPA      | -1.146 | 1.36E-35 | 1.11E-33 |
| IGKV1OR10 | -1.801 | 1.65E-35 | 1.34E-33 |
| SH2D7     | -1.179 | 2.03E-35 | 1.64E-33 |
| IGHV3OR16 | -1.556 | 3.26E-35 | 2.61E-33 |
| ZMAT4     | -1.797 | 3.77E-35 | 3.01E-33 |
| GRIN2A    | -1.419 | 5.37E-35 | 4.25E-33 |
| TEX11     | -1.174 | 5.70E-35 | 4.49E-33 |
| C11orf86  | -1.035 | 5.81E-35 | 4.56E-33 |
| MEP1AP4   | -1.542 | 7.76E-35 | 6.05E-33 |
| C16orf89  | -1.103 | 8.34E-35 | 6.45E-33 |
| TMEM100   | -1.081 | 9.41E-35 | 7.25E-33 |
| TNFRSF13B | -1.207 | 1.24E-34 | 9.53E-33 |
| ENPP6     | -1.236 | 1.89E-34 | 1.44E-32 |
| SYT9      | -1.804 | 2.13E-34 | 1.62E-32 |
| SVOPL     | -1.342 | 2.47E-34 | 1.87E-32 |
| FCER2     | -1.250 | 2.82E-34 | 2.13E-32 |
| ADRA1A    | -1.572 | 4.60E-34 | 3.47E-32 |
| UNC5D     | -1.455 | 6.29E-34 | 4.70E-32 |
| SLITRK2   | -1.535 | 1.02E-33 | 7.61E-32 |
| TMEM151B  | -1.343 | 1.16E-33 | 8.61E-32 |
| BEX1      | -1.312 | 1.18E-33 | 8.73E-32 |
| ENAM      | -1.364 | 1.36E-33 | 9.99E-32 |
| HMGCLL1   | -1.429 | 1.61E-33 | 1.18E-31 |
| PCOLCE2   | -1.092 | 2.00E-33 | 1.46E-31 |
| PROKR1    | -1.754 | 2.15E-33 | 1.57E-31 |
| CNTFR     | -1.381 | 3.07E-33 | 2.21E-31 |
| IGKV1OR22 | -1.451 | 3.36E-33 | 2.40E-31 |
| KIF1A     | -1.096 | 3.49E-33 | 2.48E-31 |
| MOBP      | -1.410 | 8.71E-33 | 6.10E-31 |
| TUBB4A    | -1.173 | 9.15E-33 | 6.39E-31 |
| UGT1A1    | -1.259 | 9.18E-33 | 6.39E-31 |
| HTR4      | -1.133 | 1.51E-32 | 1.05E-30 |
| ANO5      | -1.026 | 2.02E-32 | 1.39E-30 |
| GLP2R     | -1.025 | 2.06E-32 | 1.41E-30 |
| ADRB3     | -1.604 | 3.01E-32 | 2.05E-30 |
| ALK       | -1.469 | 3.03E-32 | 2.06E-30 |



|          |        |          |          |
|----------|--------|----------|----------|
| CALY     | -1.352 | 3.44E-32 | 2.33E-30 |
| CELA3B   | -1.607 | 7.04E-32 | 4.73E-30 |
| INA      | -1.193 | 7.83E-32 | 5.25E-30 |
| AP001627 | -1.413 | 1.56E-31 | 1.04E-29 |
| FCRL4    | -1.413 | 1.68E-31 | 1.11E-29 |
| ZBTB16   | -1.136 | 2.84E-31 | 1.85E-29 |
| FXYD1    | -1.176 | 2.87E-31 | 1.87E-29 |
| PDZRN4   | -1.081 | 3.58E-31 | 2.32E-29 |
| GFRA2    | -1.035 | 7.83E-31 | 4.99E-29 |
| GAP43    | -1.079 | 8.13E-31 | 5.17E-29 |
| TPH1     | -1.024 | 1.28E-30 | 8.07E-29 |
| IGKV3OR2 | -1.401 | 1.30E-30 | 8.16E-29 |
| HTR3A    | -1.270 | 1.43E-30 | 9.00E-29 |
| LCN10    | -1.631 | 1.56E-30 | 9.73E-29 |
| HAND2    | -1.002 | 1.87E-30 | 1.17E-28 |
| CPB1     | -1.551 | 2.74E-30 | 1.69E-28 |
| CLEC4G   | -1.315 | 3.41E-30 | 2.10E-28 |
| IGHJ3P   | -1.269 | 3.52E-30 | 2.15E-28 |
| MAL      | -1.078 | 4.11E-30 | 2.50E-28 |
| POU3F3   | -1.409 | 4.39E-30 | 2.66E-28 |
| DIRAS2   | -1.396 | 4.67E-30 | 2.83E-28 |
| ELAVL4   | -1.133 | 4.94E-30 | 2.98E-28 |
| IGHV6    | -1.094 | 5.96E-30 | 3.59E-28 |
| SEZ6L    | -1.271 | 7.71E-30 | 4.61E-28 |
| SVOP     | -1.298 | 7.97E-30 | 4.75E-28 |
| SNTG2    | -1.503 | 8.68E-30 | 5.15E-28 |
| CCL23    | -1.152 | 9.32E-30 | 5.49E-28 |
| IGKV6D   | -1.351 | 1.03E-29 | 6.08E-28 |
| AQPEP    | -1.245 | 1.07E-29 | 6.25E-28 |
| ZNF536   | -1.128 | 1.14E-29 | 6.65E-28 |
| KLHL34   | -1.173 | 1.23E-29 | 7.14E-28 |
| TNNT3    | -1.462 | 1.43E-29 | 8.31E-28 |
| HPSE2    | -1.039 | 1.75E-29 | 1.01E-27 |
| DUSP26   | -1.173 | 2.20E-29 | 1.26E-27 |
| GNG13    | -1.250 | 2.77E-29 | 1.59E-27 |
| SYNDIG1L | -1.475 | 3.52E-29 | 2.00E-27 |
| HTR3E    | -1.714 | 3.53E-29 | 2.00E-27 |
| CDH22    | -1.522 | 4.21E-29 | 2.38E-27 |
| AICDA    | -1.614 | 4.33E-29 | 2.44E-27 |
| GLRA4    | -1.157 | 4.56E-29 | 2.56E-27 |
| ZNF676   | -1.570 | 4.59E-29 | 2.57E-27 |
| CUX2     | -1.454 | 5.15E-29 | 2.87E-27 |
| FAM181B  | -1.296 | 6.16E-29 | 3.42E-27 |
| SLC17A1  | -1.428 | 7.00E-29 | 3.86E-27 |

|           |        |          |          |
|-----------|--------|----------|----------|
| FAM163B   | -1.248 | 7.03E-29 | 3.87E-27 |
| OMD       | -1.076 | 9.09E-29 | 4.99E-27 |
| WSCD2     | -1.173 | 1.23E-28 | 6.68E-27 |
| CXCR5     | -1.410 | 1.34E-28 | 7.27E-27 |
| TMEM59L   | -1.099 | 1.46E-28 | 7.88E-27 |
| AMER3     | -1.411 | 1.54E-28 | 8.32E-27 |
| ANO3      | -1.453 | 1.72E-28 | 9.24E-27 |
| RPH3A     | -1.385 | 3.26E-28 | 1.74E-26 |
| RIC3      | -1.140 | 3.81E-28 | 2.02E-26 |
| SMYD1     | -1.225 | 5.23E-28 | 2.75E-26 |
| PCP4L1    | -1.154 | 5.28E-28 | 2.77E-26 |
| BEND4     | -1.225 | 6.96E-28 | 3.64E-26 |
| P2RY12    | -1.147 | 7.34E-28 | 3.83E-26 |
| UGT1A9    | -1.650 | 7.73E-28 | 4.02E-26 |
| GNG8      | -1.437 | 9.48E-28 | 4.91E-26 |
| C10orf105 | -1.637 | 9.49E-28 | 4.91E-26 |
| ACSM5     | -1.191 | 1.19E-27 | 6.17E-26 |
| GP2       | -1.045 | 1.20E-27 | 6.20E-26 |
| WDR17     | -1.186 | 1.23E-27 | 6.32E-26 |
| CBLN2     | -1.101 | 2.16E-27 | 1.10E-25 |
| DPEP3     | -1.442 | 2.41E-27 | 1.22E-25 |
| FGFBP2    | -1.186 | 2.84E-27 | 1.43E-25 |
| IGHV4OR15 | -1.646 | 2.84E-27 | 1.43E-25 |
| CHST8     | -1.484 | 3.01E-27 | 1.51E-25 |
| KCNE2     | -1.294 | 3.27E-27 | 1.64E-25 |
| KCNK3     | -1.014 | 3.85E-27 | 1.91E-25 |
| GFI1B     | -1.145 | 4.00E-27 | 1.98E-25 |
| TCL1A     | -1.150 | 4.05E-27 | 1.99E-25 |
| CRHBP     | -1.257 | 6.31E-27 | 3.08E-25 |
| CLEC9A    | -1.189 | 6.65E-27 | 3.23E-25 |
| SFTA1P    | -1.289 | 7.63E-27 | 3.69E-25 |
| NRG2      | -1.190 | 8.25E-27 | 3.97E-25 |
| SH3GL2    | -1.220 | 8.93E-27 | 4.28E-25 |
| ERVH      | -1.328 | 9.63E-27 | 4.59E-25 |
| IGKV1OR2  | -1.448 | 1.17E-26 | 5.55E-25 |
| KCNK2     | -1.230 | 1.26E-26 | 5.96E-25 |
| NTNG1     | -1.275 | 1.37E-26 | 6.45E-25 |
| DRD5      | -1.414 | 1.78E-26 | 8.37E-25 |
| COL6A5    | -1.270 | 2.17E-26 | 1.01E-24 |
| ANKS1B    | -1.144 | 2.45E-26 | 1.14E-24 |
| NOVA1     | -1.090 | 2.51E-26 | 1.17E-24 |
| METTTL24  | -1.106 | 2.90E-26 | 1.34E-24 |
| CLCA2     | -1.155 | 2.96E-26 | 1.36E-24 |
| FLJ38122  | -1.459 | 2.99E-26 | 1.38E-24 |

|            |        |          |          |
|------------|--------|----------|----------|
| MAMDC2     | -1.016 | 3.13E-26 | 1.44E-24 |
| RPL15P21   | -1.390 | 3.39E-26 | 1.55E-24 |
| PPP1R1A    | -1.035 | 3.83E-26 | 1.74E-24 |
| ASCL1      | -1.618 | 4.09E-26 | 1.85E-24 |
| CACNG7     | -1.627 | 4.68E-26 | 2.12E-24 |
| SEZ6       | -1.264 | 4.86E-26 | 2.19E-24 |
| CELF4      | -1.189 | 5.28E-26 | 2.37E-24 |
| TMEM229A   | -1.466 | 5.54E-26 | 2.48E-24 |
| IGHV3OR15  | -1.141 | 6.00E-26 | 2.68E-24 |
| VWC2       | -1.212 | 9.07E-26 | 3.98E-24 |
| AKR1B10P1  | -1.345 | 9.09E-26 | 3.98E-24 |
| PENK       | -1.173 | 1.28E-25 | 5.57E-24 |
| TRDV1      | -1.389 | 1.41E-25 | 6.13E-24 |
| IGLV5      | -1.137 | 1.45E-25 | 6.26E-24 |
| ZNF492     | -1.349 | 1.46E-25 | 6.28E-24 |
| SCGB2A1    | -1.045 | 2.11E-25 | 9.06E-24 |
| VIT        | -1.055 | 2.56E-25 | 1.10E-23 |
| SLC17A7    | -1.049 | 2.81E-25 | 1.20E-23 |
| LIPC       | -1.023 | 3.25E-25 | 1.37E-23 |
| LRAT       | -1.273 | 3.64E-25 | 1.52E-23 |
| IGKV2OR22  | -1.226 | 3.67E-25 | 1.54E-23 |
| ERBB4      | -1.550 | 3.91E-25 | 1.63E-23 |
| DNER       | -1.022 | 4.28E-25 | 1.78E-23 |
| KCNS2      | -1.352 | 4.72E-25 | 1.94E-23 |
| RFX6       | -1.199 | 4.74E-25 | 1.95E-23 |
| GRIA1      | -1.280 | 7.83E-25 | 3.20E-23 |
| TMEM72     | -1.065 | 9.55E-25 | 3.88E-23 |
| CASC18     | -1.373 | 1.02E-24 | 4.13E-23 |
| OR2W3      | -1.206 | 1.41E-24 | 5.64E-23 |
| NPY5R      | -1.392 | 1.59E-24 | 6.35E-23 |
| UNC80      | -1.341 | 1.68E-24 | 6.72E-23 |
| IGKV5      | -1.019 | 2.19E-24 | 8.69E-23 |
| NAP1L6     | -1.577 | 2.56E-24 | 1.01E-22 |
| KCNG3      | -1.126 | 2.88E-24 | 1.14E-22 |
| LGI3       | -1.233 | 4.78E-24 | 1.87E-22 |
| ZIC1       | -1.523 | 4.86E-24 | 1.89E-22 |
| NOS1       | -1.055 | 5.47E-24 | 2.13E-22 |
| HNRNPA1P33 | -1.560 | 5.48E-24 | 2.13E-22 |
| CRABP1     | -1.075 | 6.12E-24 | 2.37E-22 |
| KRT1       | -1.182 | 7.48E-24 | 2.89E-22 |
| HMX3       | -1.339 | 7.91E-24 | 3.05E-22 |
| C1orf177   | -1.107 | 8.97E-24 | 3.45E-22 |
| KIAA1045   | -1.197 | 9.21E-24 | 3.54E-22 |
| FCRL1      | -1.091 | 9.64E-24 | 3.69E-22 |

|           |        |          |          |
|-----------|--------|----------|----------|
| TMEM132C  | -1.036 | 9.77E-24 | 3.73E-22 |
| OR2S1P    | -1.123 | 1.05E-23 | 3.99E-22 |
| CPNE4     | -1.192 | 1.06E-23 | 4.02E-22 |
| GRIA4     | -1.071 | 1.26E-23 | 4.78E-22 |
| HS6ST3    | -1.293 | 1.57E-23 | 5.95E-22 |
| RSPO1     | -1.109 | 1.68E-23 | 6.35E-22 |
| SCRG1     | -1.075 | 2.23E-23 | 8.39E-22 |
| GPR88     | -1.257 | 2.75E-23 | 1.03E-21 |
| NLGN1     | -1.492 | 4.35E-23 | 1.62E-21 |
| CNTNAP3   | -1.035 | 1.29E-22 | 4.74E-21 |
| SSTR3     | -1.147 | 1.33E-22 | 4.86E-21 |
| ZNF727    | -1.327 | 1.75E-22 | 6.37E-21 |
| IGKV1D    | -1.165 | 2.16E-22 | 7.80E-21 |
| SIGLEC6   | -1.042 | 2.36E-22 | 8.51E-21 |
| NWD2      | -1.029 | 2.40E-22 | 8.63E-21 |
| AC104699  | -1.138 | 2.71E-22 | 9.71E-21 |
| SULT4A1   | -1.052 | 3.13E-22 | 1.12E-20 |
| PRAMENP   | -1.252 | 3.71E-22 | 1.32E-20 |
| DPP10     | -1.306 | 3.89E-22 | 1.38E-20 |
| CCDC129   | -1.087 | 4.92E-22 | 1.73E-20 |
| HTR7      | -1.044 | 5.15E-22 | 1.81E-20 |
| IGHV1OR21 | -1.184 | 5.37E-22 | 1.89E-20 |
| CYP4B1    | -1.002 | 7.61E-22 | 2.64E-20 |
| RBFOX1    | -1.075 | 7.79E-22 | 2.70E-20 |
| C8orf46   | -1.199 | 8.71E-22 | 3.01E-20 |
| FADS6     | -1.040 | 8.91E-22 | 3.07E-20 |
| GRIA2     | -1.485 | 1.14E-21 | 3.93E-20 |
| ABCC8     | -1.016 | 1.31E-21 | 4.47E-20 |
| GPR142    | -1.382 | 1.36E-21 | 4.65E-20 |
| KCNB2     | -1.351 | 1.43E-21 | 4.87E-20 |
| SLC5A11   | -1.032 | 1.69E-21 | 5.74E-20 |
| NRAP      | -1.070 | 2.22E-21 | 7.51E-20 |
| RPL10L    | -1.026 | 2.25E-21 | 7.58E-20 |
| PLA2G2C   | -1.422 | 2.65E-21 | 8.92E-20 |
| FAM218A   | -1.186 | 2.68E-21 | 9.02E-20 |
| SLC5A8    | -1.300 | 2.94E-21 | 9.85E-20 |
| MT1DP     | -1.104 | 3.04E-21 | 1.01E-19 |
| GRIA3     | -1.019 | 4.22E-21 | 1.40E-19 |
| CRYBA2    | -1.017 | 4.77E-21 | 1.58E-19 |
| FAR2P2    | -1.117 | 5.77E-21 | 1.90E-19 |
| NLRP7     | -1.087 | 8.40E-21 | 2.74E-19 |
| TMEM132D  | -1.125 | 1.07E-20 | 3.48E-19 |
| TAS1R1    | -1.236 | 1.15E-20 | 3.71E-19 |
| NPAS4     | -1.242 | 1.30E-20 | 4.16E-19 |

|               |        |          |          |
|---------------|--------|----------|----------|
| FNDC9         | -1.238 | 1.30E-20 | 4.16E-19 |
| PTCHD1        | -1.205 | 1.74E-20 | 5.53E-19 |
| SNCB          | -1.418 | 1.95E-20 | 6.17E-19 |
| MT1P3         | -1.480 | 2.10E-20 | 6.62E-19 |
| ACADL         | -1.398 | 2.12E-20 | 6.67E-19 |
| DKFZp779M0652 | -1.328 | 2.21E-20 | 6.91E-19 |
| SPX           | -1.325 | 2.99E-20 | 9.28E-19 |
| AF131217      | -1.061 | 3.14E-20 | 9.71E-19 |
| KCNIP1        | -1.218 | 3.71E-20 | 1.14E-18 |
| KCNJ16        | -1.147 | 4.30E-20 | 1.32E-18 |
| CSMD1         | -1.172 | 4.45E-20 | 1.36E-18 |
| CLCNKB        | -1.218 | 4.59E-20 | 1.40E-18 |
| CLEC17A       | -1.060 | 5.22E-20 | 1.59E-18 |
| DACH2         | -1.373 | 5.76E-20 | 1.75E-18 |
| TAT           | -1.174 | 6.08E-20 | 1.84E-18 |
| KLRF1         | -1.079 | 6.39E-20 | 1.93E-18 |
| IL1RAPL1      | -1.420 | 7.79E-20 | 2.35E-18 |
| STXBP5L       | -1.077 | 8.08E-20 | 2.43E-18 |
| CYP11A1       | -1.056 | 1.30E-19 | 3.86E-18 |
| MIR8071       | -1.373 | 1.35E-19 | 3.97E-18 |
| SLC8A3        | -1.047 | 1.44E-19 | 4.25E-18 |
| TRIM55        | -1.426 | 1.51E-19 | 4.43E-18 |
| SCTR          | -1.027 | 1.78E-19 | 5.18E-18 |
| LIX1          | -1.266 | 2.48E-19 | 7.16E-18 |
| GALNT13       | -1.046 | 2.63E-19 | 7.56E-18 |
| AARD          | -1.056 | 2.89E-19 | 8.32E-18 |
| CCDC178       | -1.159 | 6.58E-19 | 1.83E-17 |
| AC096579      | -1.191 | 7.09E-19 | 1.97E-17 |
| LEP           | -1.162 | 7.18E-19 | 1.99E-17 |
| NOL4          | -1.051 | 1.22E-18 | 3.35E-17 |
| CYP4F29P      | -1.050 | 1.30E-18 | 3.56E-17 |
| MYO3A         | -1.062 | 1.83E-18 | 4.98E-17 |
| IL5RA         | -1.008 | 1.88E-18 | 5.11E-17 |
| AF186192      | -1.295 | 2.23E-18 | 6.02E-17 |
| CPEB1         | -1.116 | 2.42E-18 | 6.46E-17 |
| CELA3A        | -1.301 | 2.74E-18 | 7.28E-17 |
| UTS2B         | -1.107 | 3.27E-18 | 8.64E-17 |
| CLEC4F        | -1.062 | 3.27E-18 | 8.65E-17 |
| IGKV7         | -1.122 | 3.93E-18 | 1.03E-16 |
| FOXI2         | -1.258 | 4.13E-18 | 1.08E-16 |
| RPL7AP28      | -1.333 | 5.17E-18 | 1.35E-16 |
| LILRP2        | -1.142 | 6.02E-18 | 1.56E-16 |
| IGHV1OR15     | -1.269 | 6.76E-18 | 1.75E-16 |
| IGSF11        | -1.372 | 7.34E-18 | 1.89E-16 |

|            |        |          |          |
|------------|--------|----------|----------|
| RGS22      | -1.048 | 8.44E-18 | 2.15E-16 |
| LRRTM4     | -1.145 | 1.00E-17 | 2.55E-16 |
| KCNC1      | -1.085 | 1.12E-17 | 2.83E-16 |
| AF064860   | -1.349 | 1.20E-17 | 3.01E-16 |
| CYP8B1     | -1.240 | 1.39E-17 | 3.47E-16 |
| TRGV4      | -1.201 | 1.52E-17 | 3.79E-16 |
| BRINP2     | -1.197 | 1.66E-17 | 4.10E-16 |
| SNAP25     | -1.080 | 1.82E-17 | 4.50E-16 |
| KRT14      | -1.110 | 2.24E-17 | 5.50E-16 |
| CETN4P     | -1.333 | 2.40E-17 | 5.87E-16 |
| NCAN       | -1.303 | 2.67E-17 | 6.53E-16 |
| TRGV2      | -1.255 | 3.19E-17 | 7.76E-16 |
| ANXA8L1    | -1.011 | 4.03E-17 | 9.64E-16 |
| DDX25      | -1.263 | 4.42E-17 | 1.05E-15 |
| AC002511   | -1.004 | 5.13E-17 | 1.22E-15 |
| SEC14L6    | -1.008 | 5.85E-17 | 1.39E-15 |
| FAM187B2P  | -1.208 | 8.26E-17 | 1.94E-15 |
| HCN4       | -1.176 | 1.08E-16 | 2.52E-15 |
| SFTPD      | -1.062 | 1.09E-16 | 2.54E-15 |
| hsa        | -1.349 | 1.37E-16 | 3.18E-15 |
| AC004637   | -1.325 | 1.45E-16 | 3.35E-15 |
| CCDC169    | -1.324 | 1.57E-16 | 3.62E-15 |
| MIR133A1HG | -1.227 | 2.09E-16 | 4.79E-15 |
| TRIM50     | -1.205 | 2.95E-16 | 6.71E-15 |
| STAC2      | -1.002 | 3.40E-16 | 7.68E-15 |
| HCG4       | -1.114 | 3.64E-16 | 8.18E-15 |
| TPPP2      | -1.214 | 4.38E-16 | 9.83E-15 |
| PCDH8      | -1.085 | 4.58E-16 | 1.03E-14 |
| CARTPT     | -1.033 | 5.43E-16 | 1.21E-14 |
| LRP1B      | -1.097 | 5.80E-16 | 1.29E-14 |
| TRPC7      | -1.143 | 6.39E-16 | 1.41E-14 |
| AC246787   | -1.251 | 7.00E-16 | 1.54E-14 |
| PAX4       | -1.095 | 7.40E-16 | 1.63E-14 |
| CYP4F24P   | -1.186 | 7.65E-16 | 1.68E-14 |
| TMEM155    | -1.014 | 8.77E-16 | 1.92E-14 |
| WDR64      | -1.288 | 1.42E-15 | 3.06E-14 |
| GRIK1      | -1.049 | 2.64E-15 | 5.60E-14 |
| EFCAB1     | -1.019 | 2.84E-15 | 6.00E-14 |
| IGKV2      | -1.150 | 3.13E-15 | 6.58E-14 |
| GP9        | -1.126 | 3.14E-15 | 6.60E-14 |
| TCF23      | -1.058 | 3.86E-15 | 8.05E-14 |
| KIR3DL2    | -1.290 | 4.33E-15 | 8.97E-14 |
| AMHR2      | -1.234 | 4.72E-15 | 9.73E-14 |
| HIGD1AP1   | -1.174 | 5.34E-15 | 1.09E-13 |

|           |        |          |          |
|-----------|--------|----------|----------|
| NPPC      | -1.080 | 6.14E-15 | 1.24E-13 |
| ZNF812    | -1.142 | 6.52E-15 | 1.32E-13 |
| ZFR2      | -1.130 | 1.13E-14 | 2.25E-13 |
| FAM216B   | -1.041 | 1.30E-14 | 2.55E-13 |
| SYT15     | -1.038 | 1.36E-14 | 2.68E-13 |
| MAP1LC3C  | -1.032 | 1.39E-14 | 2.73E-13 |
| GCSAML    | -1.002 | 1.42E-14 | 2.77E-13 |
| AC016995  | -1.064 | 1.45E-14 | 2.83E-13 |
| WFIKKN2   | -1.029 | 1.62E-14 | 3.14E-13 |
| SLC7A3    | -1.167 | 1.65E-14 | 3.19E-13 |
| IPLL1     | -1.055 | 1.67E-14 | 3.24E-13 |
| AL161668  | -1.039 | 1.87E-14 | 3.61E-13 |
| C1QTNF9   | -1.229 | 2.21E-14 | 4.24E-13 |
| CAMP      | -1.097 | 2.55E-14 | 4.87E-13 |
| OPN4      | -1.184 | 3.04E-14 | 5.77E-13 |
| TRGV3     | -1.089 | 3.15E-14 | 5.96E-13 |
| TRBV27    | -1.226 | 3.19E-14 | 6.03E-13 |
| IPLL3P    | -1.202 | 3.23E-14 | 6.09E-13 |
| C16orf96  | -1.176 | 3.49E-14 | 6.57E-13 |
| RIMS2     | -1.034 | 3.99E-14 | 7.46E-13 |
| TRIM63    | -1.106 | 4.25E-14 | 7.93E-13 |
| IGKV2D    | -1.163 | 4.27E-14 | 7.95E-13 |
| ELL2P1    | -1.045 | 5.02E-14 | 9.28E-13 |
| CCNA1     | -1.074 | 5.38E-14 | 9.94E-13 |
| PCDHA1    | -1.173 | 1.14E-13 | 2.03E-12 |
| SYT6      | -1.068 | 1.21E-13 | 2.14E-12 |
| CHODL     | -1.002 | 1.37E-13 | 2.41E-12 |
| UGT3A2    | -1.059 | 1.55E-13 | 2.72E-12 |
| LGSN      | -1.057 | 1.87E-13 | 3.26E-12 |
| UGT1A7    | -1.128 | 2.52E-13 | 4.35E-12 |
| ABHD17AP6 | -1.186 | 6.02E-13 | 1.02E-11 |
| GSTA2     | -1.009 | 1.13E-12 | 1.86E-11 |
| PEBP4     | -1.116 | 1.14E-12 | 1.88E-11 |
| GPR31     | -1.108 | 2.05E-12 | 3.31E-11 |
| DCX       | -1.015 | 2.22E-12 | 3.57E-11 |
| C5orf17   | -1.009 | 3.79E-12 | 5.95E-11 |
| LRRC37A7P | -1.051 | 4.49E-12 | 7.01E-11 |
| DIRC3     | -1.069 | 4.69E-12 | 7.30E-11 |
| PKD1L2    | -1.076 | 9.23E-12 | 1.39E-10 |
| CNTN5     | -1.074 | 9.44E-12 | 1.42E-10 |
| AC078941  | -1.006 | 1.28E-11 | 1.90E-10 |
| RPL7P60   | -1.084 | 1.89E-11 | 2.78E-10 |
| BFSP2     | -1.015 | 4.47E-11 | 6.30E-10 |
| AC013264  | -1.111 | 4.90E-11 | 6.87E-10 |

|           |        |          |          |
|-----------|--------|----------|----------|
| ANKRD20A4 | -1.040 | 6.87E-11 | 9.48E-10 |
| CALHM1    | -1.015 | 7.04E-11 | 9.69E-10 |
| SLC4A1    | -1.073 | 1.74E-10 | 2.30E-09 |
| AC005235  | -1.063 | 2.22E-10 | 2.90E-09 |
| PVALB     | -1.010 | 2.71E-10 | 3.50E-09 |
| HDAC1P1   | -1.031 | 3.11E-10 | 3.99E-09 |

**Table S3. Unfavorable genes in colon cancer**

| Gene names | UniProtKB | Length | Protein names                                                         |
|------------|-----------|--------|-----------------------------------------------------------------------|
| LRCH4      | O75427    | 683    | Leucine-rich repeat and calponin homology domain-containing protein 4 |
| POFUT2     | Q9Y2G5    | 429    | GDP-fucose protein O-fucosyltransferase 2                             |
| CLK3       | P49761    | 638    | Dual specificity protein kinase CLK3                                  |
| EGFL7      | Q9UHF1    | 273    | Epidermal growth factor-like protein 7                                |
| DPP7       | Q9UHL4    | 492    | Dipeptidyl peptidase 2                                                |
| HSH2D      | Q96JZ2    | 352    | Hematopoietic SH2 domain-containing protein                           |
| ASB6       | Q9NWX5    | 421    | Ankyrin repeat and SOCS box protein 6                                 |
| SPAG4      | Q9NPE6    | 437    | Sperm-associated antigen 4 protein                                    |
| EXOC3L4    | Q17RC7    | 722    | Exocyst complex component 3-like protein 4                            |
| HSPA1A     | P0DMV8    | 641    | Heat shock 70 kDa protein 1A                                          |
| PAQR6      | Q6TCH4    | 344    | Membrane progesterin receptor delta                                   |
| FAM69B     | Q5VUD6    | 431    | Divergent protein kinase domain 1B                                    |
| CRACR2B    | Q8N4Y2    | 399    | EF-hand calcium-binding domain-containing protein 4A                  |
| ARHGAP4    | P98171    | 946    | Rho GTPase-activating protein 4                                       |
| NPDC1      | Q9NQX5    | 325    | Neural proliferation differentiation and control protein 1            |
| DAPK1      | P53355    | 1430   | Death-associated protein kinase 1                                     |
| CNPY3      | Q9BT09    | 278    | Protein canopy homolog 3                                              |
| ARL8A      | Q96BM9    | 186    | ADP-ribosylation factor-like protein 8A                               |
| INAFM1     | C9JVV0    | 142    | Putative transmembrane protein INAFM1                                 |
| RHBDD2     | Q6NTF9    | 364    | Rhomboid domain-containing protein 2                                  |
| SEMA4C     | Q9C0C4    | 833    | Semaphorin-4C                                                         |
| GDI1       | P31150    | 447    | Rab GDP dissociation inhibitor alpha                                  |
| SLC10A3    | P09131    | 477    | P3 protein                                                            |
| PI4K2A     | Q9BTU6    | 479    | Phosphatidylinositol 4-kinase type 2-alpha                            |
| HOMER3     | Q9NSC5    | 361    | Homer protein homolog 3                                               |
| HSD17B14   | Q9BPX1    | 270    | 17-beta-hydroxysteroid dehydrogenase 14                               |
| NPC2       | P61916    | 151    | NPC intracellular cholesterol transporter 2                           |
| CRYAB      | P02511    | 175    | Alpha-crystallin B chain                                              |
| LIMK1      | P53667    | 647    | LIM domain kinase 1                                                   |
| PYCR2      | Q96C36    | 320    | Pyrroline-5-carboxylate reductase 2                                   |
| RRNAD1     | Q96FB5    | 475    | Protein RRNAD1                                                        |
| CALB2      | P22676    | 271    | Calretinin                                                            |
| GPC1       | P35052    | 558    | Glypican-1 [Cleaved into: Secreted glypican-1]                        |
| VAMP1      | P23763    | 118    | Vesicle-associated membrane protein 1                                 |



|          |        |      |                                                                    |
|----------|--------|------|--------------------------------------------------------------------|
| PPP1R3E  | Q9H7J1 | 279  | Protein phosphatase 1 regulatory subunit 3E                        |
| HOXD13   | P35453 | 343  | Homeobox protein Hox-D13                                           |
| ALAD     | P13716 | 330  | Delta-aminolevulinic acid dehydratase                              |
| ADARB1   | P78563 | 741  | Double-stranded RNA-specific editase 1                             |
| HSF4     | Q9ULV5 | 492  | Heat shock factor protein 4                                        |
| ARHGEF17 | Q96PE2 | 2063 | Rho guanine nucleotide exchange factor 17                          |
| JDP2     | Q8WYK2 | 163  | Jun dimerization protein 2                                         |
| MGEA5    | O60502 | 916  | Protein O-GlcNAcase                                                |
| COMP     | P49747 | 757  | Cartilage oligomeric matrix protein                                |
| AMH      | P03971 | 560  | Muellerian-inhibiting factor                                       |
| GPRC5B   | Q9NZH0 | 403  | G-protein coupled receptor family C group 5 member B               |
| KCNE4    | Q8WWG9 | 221  | Potassium voltage-gated channel subfamily E member 4               |
| FAM50A   | Q14320 | 339  | Protein FAM50A                                                     |
| TMEM106A | Q96A25 | 262  | Transmembrane protein 106A                                         |
| PHF1     | O43189 | 567  | PHD finger protein 1                                               |
| PRELP    | P51888 | 382  | Prolargin                                                          |
| MTHFSD   | Q2M296 | 383  | Methenyltetrahydrofolate synthase domain-containing protein        |
| HSPB1    | P04792 | 205  | Heat shock protein beta-1                                          |
| AGAP9    | Q5VTM2 | 703  | Arf-GAP with GTPase, ANK repeat and PH domain-containing protein 9 |
| DNAJB2   | P25686 | 324  | DnaJ homolog subfamily B member 2                                  |
| LMBR1L   | Q6UX01 | 489  | Protein LMBR1L                                                     |
| WBP1     | Q96G27 | 269  | WW domain-binding protein 1                                        |
| CYHR1    | Q6ZMK1 | 362  | Cysteine and histidine-rich protein 1                              |
| IGFBP3   | P17936 | 291  | Insulin-like growth factor-binding protein 3                       |
| FAM167B  | Q9BTA0 | 163  | Protein FAM167B                                                    |
| TMEM184A | Q6ZMB5 | 413  | Transmembrane protein 184A                                         |
| TMEM88   | Q6PEY1 | 159  | Transmembrane protein 88                                           |
| ALDH3B1  | P43353 | 468  | Aldehyde dehydrogenase family 3 member B1                          |
| FKBP8    | Q14318 | 412  | Peptidyl-prolyl cis-trans isomerase FKBP8                          |
| S1PR3    | Q99500 | 378  | Sphingosine 1-phosphate receptor 3                                 |
| GATAD2B  | Q8WXI9 | 593  | Transcriptional repressor p66-beta                                 |
| SEZ6L2   | Q6UXD5 | 910  | Seizure 6-like protein 2                                           |
| WWC3     | Q9ULE0 | 1092 | Protein WWC3                                                       |
| THAP3    | Q8WTV1 | 239  | THAP domain-containing protein 3                                   |
| VSIG4    | Q9Y279 | 399  | V-set and immunoglobulin domain-containing protein 4               |
| TBC1D10B | Q4KMP7 | 808  | TBC1 domain family member 10B                                      |
| DENND6B  | Q8NEG7 | 585  | Protein DENND6B                                                    |
| INHBB    | P09529 | 407  | Inhibin beta B chain                                               |
| GAS1     | P54826 | 345  | Growth arrest-specific protein 1                                   |
| GPR137B  | O60478 | 399  | Integral membrane protein GPR137B                                  |
| GOLGA2   | Q08379 | 1002 | Golgin subfamily A member 2                                        |
| CRY2     | Q49AN0 | 593  | Cryptochrome-2                                                     |

|           |        |      |                                                                   |
|-----------|--------|------|-------------------------------------------------------------------|
| DEF6      | Q01524 | 100  | Defensin-6                                                        |
| WBSCR27   | Q8N6F8 | 245  | Methyltransferase-like protein 27                                 |
| FAM219B   | Q5XKK7 | 198  | Protein FAM219B                                                   |
| FAM3A     | P98173 | 230  | Protein FAM3A                                                     |
| CCM2      | Q9BSQ5 | 444  | Cerebral cavernous malformations 2 protein                        |
| RHOG      | P84095 | 191  | Rho-related GTP-binding protein RhoG                              |
| ADAMTSL4  | Q6UY14 | 1074 | ADAMTS-like protein 4                                             |
| DVL3      | Q92997 | 716  | Segment polarity protein dishevelled homolog DVL-3                |
| SPOCK1    | Q08629 | 439  | Testican-1                                                        |
| AIP       | O00170 | 330  | AH receptor-interacting protein                                   |
| NR1D1     | P20393 | 614  | Nuclear receptor subfamily 1 group D member 1                     |
| TIMP1     | P01033 | 207  | Metalloproteinase inhibitor 1                                     |
| RNF32     | Q9H0A6 | 362  | RING finger protein 32                                            |
| PNMA5     | Q96PV4 | 448  | Paraneoplastic antigen-like protein 5                             |
| ANKRD39   | Q53RE8 | 183  | Ankyrin repeat domain-containing protein 39                       |
| BCAM      | P50895 | 628  | Basal cell adhesion molecule                                      |
| PTGES     | O14684 | 152  | Prostaglandin E synthase                                          |
| KRTAP5-1  | Q6L8H4 | 278  | Keratin-associated protein 5-1                                    |
| TNS1      | Q9HBL0 | 1735 | Tensin-1                                                          |
| THBS3     | P49746 | 956  | Thrombospondin-3                                                  |
| CHD3      | Q12873 | 2000 | Chromodomain-helicase-DNA-binding protein 3                       |
| CTSD      | P07339 | 412  | Cathepsin D                                                       |
| USP20     | Q9Y2K6 | 914  | Ubiquitin carboxyl-terminal hydrolase 20                          |
| CUL9      | Q8IWT3 | 2517 | Cullin-9                                                          |
| RBP7      | Q96R05 | 134  | Retinoid-binding protein 7                                        |
| TAOK2     | Q9UL54 | 1235 | Serine/threonine-protein kinase TAO2                              |
| SLC39A13  | Q96H72 | 371  | Zinc transporter ZIP13                                            |
| TPM2      | P07951 | 284  | Tropomyosin beta chain                                            |
| TSC22D4   | Q9Y3Q8 | 395  | TSC22 domain family protein 4                                     |
| PBXIP1    | Q96AQ6 | 731  | Pre-B-cell leukemia transcription factor-interacting protein<br>1 |
| KDM4B     | O94953 | 1096 | Lysine-specific demethylase 4B                                    |
| SERPINE1  | P05121 | 402  | Plasminogen activator inhibitor 1                                 |
| RNF187    | Q5TA31 | 235  | E3 ubiquitin-protein ligase RNF187                                |
| AFAP1L1   | Q8TED9 | 768  | Actin filament-associated protein 1-like 1                        |
| MIER2     | Q8N344 | 545  | Mesoderm induction early response protein 2                       |
| HIST2H2BE | Q16778 | 126  | Histone H2B type 2-E                                              |
| PRNP      | F7VJQ1 | 73   | Alternative prion protein                                         |
| C8G       | P07360 | 202  | Complement component C8 gamma chain                               |
| FSTL3     | O95633 | 263  | Follistatin-related protein 3                                     |
| OLFM2     | O95897 | 454  | Noelin-2                                                          |
| MEGF6     | O75095 | 1541 | Multiple epidermal growth factor-like domains protein 6           |
| DNAJC4    | Q9NNZ3 | 241  | DnaJ homolog subfamily C member 4                                 |
| IDUA      | P35475 | 653  | Alpha-L-iduronidase                                               |

|           |        |      |                                                                                   |
|-----------|--------|------|-----------------------------------------------------------------------------------|
| PPP2R2D   | Q66LE6 | 453  | Serine/threonine-protein phosphatase 2A 55 kDa regulatory subunit B delta isoform |
| TSPYL2    | Q9H2G4 | 693  | Testis-specific Y-encoded-like protein 2                                          |
| PLOD3     | O60568 | 738  | Multifunctional procollagen lysine hydroxylase and glycosyltransferase LH3        |
| PARP6     | Q2NL67 | 630  | Protein mono-ADP-ribosyltransferase PARP6                                         |
| NUMBL     | Q9Y6R0 | 609  | Numb-like protein                                                                 |
| AKAP8L    | Q9ULX6 | 646  | A-kinase anchor protein 8-like                                                    |
| PLEKHG2   | Q9H7P9 | 1386 | Pleckstrin homology domain-containing family G member 2                           |
| FOXC1     | Q12948 | 553  | Forkhead box protein C1                                                           |
| TRIP10    | Q15642 | 601  | Cdc42-interacting protein 4                                                       |
| PXDC1     | Q5TGL8 | 231  | PX domain-containing protein 1                                                    |
| TMPRSS3   | P57727 | 454  | Transmembrane protease serine 3                                                   |
| PRKRIP1   | Q9H875 | 184  | PRKR-interacting protein 1                                                        |
| AOC3      | Q16853 | 763  | Membrane primary amine oxidase                                                    |
| SCT       | P09683 | 121  | Secretin                                                                          |
| CBX7      | O95931 | 251  | Chromobox protein homolog 7                                                       |
| LMNTD2    | Q8IXW0 | 634  | Lamin tail domain-containing protein 2                                            |
| CLK2      | P49760 | 499  | Dual specificity protein kinase CLK2                                              |
| PABPC1L   | Q4VXU2 | 614  | Polyadenylate-binding protein 1-like                                              |
| HIST1H2BD | P58876 | 126  | Histone H2B type 1-D                                                              |
| NFKB2     | Q00653 | 900  | Nuclear factor NF-kappa-B p100 subunit                                            |
| PPP1R26   | Q5T8A7 | 1209 | Protein phosphatase 1 regulatory subunit 26                                       |
| SPARCL1   | Q14515 | 664  | SPARC-like protein 1                                                              |
| PLEC      | Q15149 | 4684 | Plectin                                                                           |
| EPHB4     | P54760 | 987  | Ephrin type-B receptor 4                                                          |
| ENDOV     | Q8N8Q3 | 282  | Endonuclease V                                                                    |
| EPS8L1    | Q8TE68 | 723  | Epidermal growth factor receptor kinase substrate 8-like protein 1                |
| TNFRSF25  | Q93038 | 417  | Tumor necrosis factor receptor superfamily member 25                              |
| PCGF2     | P35227 | 344  | Polycomb group RING finger protein 2                                              |
| SHC2      | P98077 | 582  | SHC-transforming protein 2                                                        |
| TNNT1     | P13805 | 278  | Troponin T, slow skeletal muscle                                                  |
| PPP1R18   | Q6NYC8 | 613  | Phostensin                                                                        |
| FASTK     | Q14296 | 549  | Fas-activated serine/threonine kinase                                             |
| SNAI1     | O95863 | 264  | Zinc finger protein SNAI1                                                         |
| DNAJB12   | Q9NXW2 | 375  | DnaJ homolog subfamily B member 12                                                |
| HYI       | Q5T013 | 277  | Putative hydroxypyruvate isomerase                                                |
| ADAMTSL2  | Q86TH1 | 951  | ADAMTS-like protein 2                                                             |
| MFNG      | O00587 | 321  | Beta-1,3-N-acetylglucosaminyltransferase manic fringe                             |
| TFPT      | P0C1Z6 | 253  | TCF3 fusion partner                                                               |
| ZNF385A   | Q96PM9 | 386  | Zinc finger protein 385A                                                          |
| ADAP1     | O75689 | 374  | Arf-GAP with dual PH domain-containing protein 1                                  |
| ABHD8     | Q96I13 | 439  | Protein ABHD8                                                                     |

|          |        |      |                                                                                                  |
|----------|--------|------|--------------------------------------------------------------------------------------------------|
| MOGS     | Q13724 | 837  | Mannosyl-oligosaccharide glucosidase                                                             |
| PTPN6    | P29350 | 595  | Tyrosine-protein phosphatase non-receptor type 6                                                 |
| GAL3ST4  | Q96RP7 | 486  | Galactose-3-O-sulfotransferase 4                                                                 |
| TMEM185B | Q9H7F4 | 350  | Transmembrane protein 185B                                                                       |
| COQ10A   | Q96MF6 | 247  | Coenzyme Q-binding protein COQ10 homolog A,<br>mitochondrial                                     |
| SMARCD3  | Q6STE5 | 483  | SWI/SNF-related matrix-associated actin-dependent<br>regulator of chromatin subfamily D member 3 |
| UBTD1    | Q9HAC8 | 227  | Ubiquitin domain-containing protein 1                                                            |
| TLN1     | Q9Y490 | 2541 | Talin-1                                                                                          |
| NEXN     | Q0ZGT2 | 675  | Nexilin                                                                                          |
| RGCC     | Q9H4X1 | 137  | Regulator of cell cycle RGCC                                                                     |
| ADAP2    | Q9NPF8 | 381  | Arf-GAP with dual PH domain-containing protein 2                                                 |
| CRTC2    | Q53ET0 | 693  | CREB-regulated transcription coactivator 2                                                       |
| FES      | P07332 | 822  | Tyrosine-protein kinase Fes/Fps                                                                  |
| FLOT1    | O75955 | 427  | Flotillin-1                                                                                      |
| NFATC4   | Q14934 | 902  | Nuclear factor of activated T-cells, cytoplasmic 4                                               |
| DNAJC17  | Q9NVM6 | 304  | DnaJ homolog subfamily C member 17                                                               |
| HSD3B7   | Q9H2F3 | 369  | 3 beta-hydroxysteroid dehydrogenase type 7                                                       |
| STK25    | O00506 | 426  | Serine/threonine-protein kinase 25                                                               |
| GPSM1    | Q86YR5 | 675  | G-protein-signaling modulator 1                                                                  |
| RAB3IL1  | Q8TBN0 | 382  | Guanine nucleotide exchange factor for Rab-3A                                                    |
| PHF21A   | Q96BD5 | 680  | PHD finger protein 21A                                                                           |
| GBGT1    | Q8N5D6 | 347  | Globoside alpha-1,3-N-acetylgalactosaminyltransferase 1                                          |
| PTRF     | Q6NZI2 | 390  | Caveolae-associated protein 1                                                                    |
| PLPPR2   | Q96GM1 | 343  | Phospholipid phosphatase-related protein type 2                                                  |
| TOR4A    | Q9NXH8 | 423  | Torsin-4A                                                                                        |
| SOX13    | Q9UN79 | 622  | Transcription factor SOX-13                                                                      |
| EBF4     | Q9BQW3 | 602  | Transcription factor COE4                                                                        |
| PTOV1    | Q86YD1 | 416  | Prostate tumor-overexpressed gene 1 protein                                                      |
| RUBCN    | Q92622 | 972  | Run domain Beclin-1-interacting and cysteine-rich<br>domain-containing protein                   |
| TPBG     | Q13641 | 420  | Trophoblast glycoprotein                                                                         |
| TBC1D8   | O95759 | 1140 | TBC1 domain family member 8                                                                      |
| BCL7A    | Q4VC05 | 210  | B-cell CLL/lymphoma 7 protein family member A                                                    |
| ATG4B    | Q9Y4P1 | 393  | Cysteine protease ATG4B                                                                          |
| ZFYVE27  | Q5T4F4 | 411  | Protrudin                                                                                        |
| ENO2     | P09104 | 434  | Gamma-enolase                                                                                    |
| NEK8     | Q86SG6 | 692  | Serine/threonine-protein kinase Nek8                                                             |
| STAC3    | Q96MF2 | 364  | SH3 and cysteine-rich domain-containing protein 3                                                |
| ABCA7    | Q8IZY2 | 2146 | Phospholipid-transporting ATPase ABCA7                                                           |
| TLX1     | P31314 | 330  | T-cell leukemia homeobox protein 1                                                               |
| ENO3     | P13929 | 434  | Beta-enolase                                                                                     |
| FLNA     | P21333 | 2647 | Filamin-A                                                                                        |

|         |        |      |                                                                                                                  |
|---------|--------|------|------------------------------------------------------------------------------------------------------------------|
| SHANK3  | Q9BYB0 | 1731 | SH3 and multiple ankyrin repeat domains protein 3                                                                |
| PKD1    | P98161 | 4303 | Polycystin-1                                                                                                     |
| ANGPTL4 | Q9BY76 | 406  | Angiopoietin-related protein 4                                                                                   |
| CD81    | P60033 | 236  | CD81 antigen                                                                                                     |
| STAB1   | Q9NY15 | 2570 | Stabilin-1                                                                                                       |
| RRAGB   | Q5VZM2 | 374  | Ras-related GTP-binding protein B                                                                                |
| GAA     | P10253 | 952  | Lysosomal alpha-glucosidase                                                                                      |
| C1orf35 | Q9BU76 | 263  | Multiple myeloma tumor-associated protein 2                                                                      |
| G0S2    | P27469 | 103  | G0/G1 switch protein 2                                                                                           |
| FAM134A | Q8NC44 | 543  | Reticulophagy regulator 2                                                                                        |
| NRIP2   | Q9BQI9 | 281  | Nuclear receptor-interacting protein 2                                                                           |
| KCTD7   | Q96MP8 | 289  | BTB/POZ domain-containing protein KCTD7                                                                          |
| UCN     | P55089 | 124  | Urocortin                                                                                                        |
| LZTS2   | Q9BRK4 | 669  | Leucine zipper putative tumor suppressor 2                                                                       |
| HOXD9   | P28356 | 352  | Homeobox protein Hox-D9                                                                                          |
| BATF    | Q16520 | 125  | Basic leucine zipper transcriptional factor ATF-like                                                             |
| PLIN4   | Q96Q06 | 1357 | Perilipin-4                                                                                                      |
| ZNF653  | Q96CK0 | 615  | Zinc finger protein 653                                                                                          |
| FOLR2   | P14207 | 255  | Folate receptor beta                                                                                             |
| ITGA5   | P08648 | 1049 | Integrin alpha-5                                                                                                 |
| LCAT    | P04180 | 440  | Phosphatidylcholine-sterol acyltransferase                                                                       |
| NR2C2AP | Q86WQ0 | 139  | Nuclear receptor 2C2-associated protein                                                                          |
| KCTD13  | Q8WZ19 | 329  | BTB/POZ domain-containing adapter for CUL3-mediated<br>RhoA degradation protein 1                                |
| SLC2A3  | P11169 | 496  | Solute carrier family 2, facilitated glucose transporter<br>member 3                                             |
| SF3A2   | Q15428 | 464  | Splicing factor 3A subunit 2                                                                                     |
| RUNX3   | Q13761 | 415  | Runt-related transcription factor 3                                                                              |
| OAZ2    | O95190 | 189  | Ornithine decarboxylase antizyme 2                                                                               |
| KCNJ8   | Q15842 | 424  | ATP-sensitive inward rectifier potassium channel 8                                                               |
| TRAF2   | Q12933 | 501  | TNF receptor-associated factor 2                                                                                 |
| PHF2    | O75151 | 1096 | Lysine-specific demethylase PHF2                                                                                 |
| KRI1    | Q8N9T8 | 703  | Protein KRI1 homolog                                                                                             |
| SIPA1   | Q96FS4 | 1042 | Signal-induced proliferation-associated protein 1                                                                |
| CSAD    | Q9Y600 | 493  | Cysteine sulfinic acid decarboxylase                                                                             |
| TUT1    | Q9H6E5 | 874  | Speckle targeted PIP5K1A-regulated poly<br>Arf-GAP with GTPase, ANK repeat and PH<br>domain-containing protein 3 |
| AGAP3   | Q96P47 | 875  | Splicing factor, arginine/serine-rich 19                                                                         |
| SCAF1   | Q9H7N4 | 1312 | CLK4-associating serine/arginine rich protein                                                                    |
| CLASRP  | Q8N2M8 | 674  | Oxysterols receptor LXR-beta                                                                                     |
| NR1H2   | P55055 | 460  | UPF0184 protein C9orf16                                                                                          |
| C9orf16 | Q9BUW7 | 83   | Phosphorylase b kinase gamma catalytic chain, liver/testis<br>isoform                                            |
| PHKG2   | P15735 | 406  |                                                                                                                  |

**Table S4. In all modules of WGCNA, the genes ranked in the top 1000 in connectivity**

| fromNode  | toNode   | weight      |
|-----------|----------|-------------|
| ABCC9     | DDR2     | 0.28393497  |
| AC018738  | RPL41P1  | 0.318344881 |
| AC026271  | RPL41P1  | 0.287650075 |
| AC107983  | HNRNPCP2 | 0.347219912 |
| ACSS3     | DDR2     | 0.262884034 |
| ACTC1     | MSRB3    | 0.272329137 |
| ACTG2     | LMOD1    | 0.306304734 |
| ADAM12    | COL5A2   | 0.277567183 |
| ADAMTS12  | COL5A2   | 0.298899887 |
| ADAMTS16  | DDR2     | 0.277805673 |
| ADAMTS2   | COL3A1   | 0.283151826 |
| ADCY2     | MSRB3    | 0.276771399 |
| AKAP12    | DDR2     | 0.270114221 |
| AL158801  | RPL41P1  | 0.272151583 |
| AMOTL1    | DDR2     | 0.274032367 |
| ANTXR1    | DDR2     | 0.28602415  |
| AOC3      | CNN1     | 0.282239887 |
| ARHGEF25  | MSRB3    | 0.264466426 |
| ASB5      | LMOD1    | 0.263268793 |
| ASPN      | DDR2     | 0.298157265 |
| BEND6     | DDR2     | 0.274523683 |
| BGN       | COL1A2   | 0.291674197 |
| BNC2      | DDR2     | 0.282499264 |
| BOC       | MSRB3    | 0.262587294 |
| BTF3L4P2  | RPL41P1  | 0.278675854 |
| C11orf98  | RPL41P1  | 0.313183097 |
| C20orf194 | SGCD     | 0.268879679 |
| CACNA2D1  | DDR2     | 0.281039235 |
| CALD1     | DDR2     | 0.289600596 |
| CARTPT    | LMOD1    | 0.274913361 |
| CASQ2     | LMOD1    | 0.277796732 |
| CCDC8     | DDR2     | 0.269132005 |
| CCDC80    | DDR2     | 0.268863758 |
| CD3G      | IKZF1    | 0.272566082 |
| CD79A     | IGHJ3    | 0.288620599 |
| CDH2      | DDR2     | 0.289700785 |
| CDK14     | DDR2     | 0.271640276 |
| CHCHD2P9  | RPL41P1  | 0.318939837 |
| CHRDL2    | LMOD1    | 0.277457789 |
| CHRM2     | LMOD1    | 0.281077216 |

|           |          |             |
|-----------|----------|-------------|
| CLMP      | DDR2     | 0.273467177 |
| CNN1      | LMOD1    | 0.295713673 |
| COL10A1   | SULF1    | 0.296699008 |
| COL11A1   | SULF1    | 0.296839853 |
| COL12A1   | FBN1     | 0.269049988 |
| COL1A1    | COL1A2   | 0.311159138 |
| COL1A2    | PPAPDC1A | 0.287323169 |
| COL24A1   | DDR2     | 0.262213365 |
| COL3A1    | PPAPDC1A | 0.284489342 |
| COL5A2    | PPAPDC1A | 0.285482178 |
| COL6A3    | DDR2     | 0.267786672 |
| COL8A1    | CORIN    | 0.277262786 |
| COL8A2    | DDR2     | 0.270499579 |
| COMP      | THBS2    | 0.272014828 |
| CORIN     | SULF1    | 0.277585322 |
| CPXM2     | MSRB3    | 0.265523688 |
| CRISPLD1  | DDR2     | 0.282331425 |
| CRYAB     | LMOD1    | 0.261519028 |
| CSDC2     | MSRB3    | 0.277465041 |
| CTAGE8    | RPL41P1  | 0.27966984  |
| CTHRC1    | SULF1    | 0.288265066 |
| CXCR2P1   | IKZF1    | 0.266589011 |
| CYP27C1   | DDR2     | 0.269529323 |
| CYP7B1    | DDR2     | 0.264748738 |
| DCN       | DDR2     | 0.261814596 |
| DDR2      | SGCD     | 0.297013854 |
| DDT       | RPL41P1  | 0.275469477 |
| DES       | LMOD1    | 0.306551002 |
| DGKI      | MSRB3    | 0.265299952 |
| DKK2      | FBN1     | 0.266865489 |
| DPYSL3    | MSRB3    | 0.274032222 |
| EEF1A1P16 | RPL6P27  | 0.28238306  |
| EEF1A1P6  | HNRNPCP2 | 0.331056042 |
| EEF1B2P6  | RPL6P27  | 0.342943793 |
| EEF1G     | RPL41P1  | 0.308771101 |
| EIF4BP3   | RPL41P1  | 0.263048004 |
| EIF4BP6   | HNRNPCP2 | 0.297702396 |
| EIF4BP7   | RPL41P1  | 0.302502284 |
| EVC       | MSRB3    | 0.264778878 |
| FABP5P7   | HNRNPCP2 | 0.287412204 |
| FAM180A   | MSRB3    | 0.274821484 |
| FAM92B    | IGHV3    | 0.278847327 |
| FAP       | SULF1    | 0.275440723 |
| FBN1      | ITGA11   | 0.280509336 |

|            |            |             |
|------------|------------|-------------|
| FGF1       | MSRB3      | 0.274427527 |
| FIBIN      | MSRB3      | 0.28272229  |
| FLNA       | TNS1       | 0.262443312 |
| FLRT2      | MSRB3      | 0.264762482 |
| FST        | MSRB3      | 0.271093449 |
| GBP5       | PTPRC      | 0.266078819 |
| GDF5       | LMOD1      | 0.276533795 |
| GDF6       | MSRB3      | 0.26669247  |
| GLI3       | MSRB3      | 0.273755954 |
| GLRB       | MSRB3      | 0.282552368 |
| GNAO1      | HAND1      | 0.273579154 |
| GREM1      | MSRB3      | 0.267053962 |
| GTF2IP1    | HNRNPA1P38 | 0.266084151 |
| GUCY1A3    | MSRB3      | 0.281209235 |
| HAND1      | LMOD1      | 0.307465138 |
| HAND2      | MSRB3      | 0.268903131 |
| HIST1H2AB  | HIST1H4C   | 0.263212959 |
| HIST1H2AH  | HIST1H4C   | 0.264904105 |
| HIST1H3I   | HIST1H4C   | 0.263317065 |
| HIST1H4A   | HIST1H4C   | 0.26269903  |
| HIST1H4B   | HIST1H4C   | 0.268327915 |
| HMGB1P10   | RPL41P1    | 0.307147171 |
| HMGB1P5    | HNRNPA1P38 | 0.309882851 |
| HMG1P37    | RPL41P1    | 0.291073368 |
| HMG2P17    | RPL41P1    | 0.29255908  |
| HMG2P3     | RPL41P1    | 0.324351272 |
| HMG2P41    | RPL41P1    | 0.329462886 |
| HNRNPA1P10 | HNRNPCP2   | 0.309048406 |
| HNRNPA1P38 | RPL41P1    | 0.342180459 |
| HNRNPCP2   | RPL35P1    | 0.341861466 |
| HOXB5      | HOXB6      | 0.336688595 |
| HOXB6      | HOXB8      | 0.329970781 |
| HOXB8      | HOXB9      | 0.266303066 |
| HSPB6      | LMOD1      | 0.268577364 |
| HSPB7      | LMOD1      | 0.293227231 |
| HSPB8      | MSRB3      | 0.263443577 |
| IFNWP19    | MIR31HG    | 0.298076444 |
| IGFBP5     | MSRB3      | 0.273042202 |
| IGHA1      | IGHV3      | 0.333031668 |
| IGHA2      | IGHV3      | 0.281741868 |
| IGHG2      | IGKV1      | 0.277392957 |
| IGHG4      | IGKV1      | 0.291867493 |
| IGHJ1      | IGHV3      | 0.365425495 |
| IGHJ2      | IGHV3      | 0.399820121 |



|           |         |             |
|-----------|---------|-------------|
| IGHJ3     | IGHV3   | 0.405914847 |
| IGHM      | IGHV3   | 0.277765637 |
| IGHV1     | IGLC2   | 0.343472762 |
| IGHV1OR21 | IGHV3   | 0.291250938 |
| IGHV2     | IGLC2   | 0.278493482 |
| IGHV3     | IGLC2   | 0.364506351 |
| IGHV3OR15 | IGKV1   | 0.279832655 |
| IGHV4     | IGLC2   | 0.341359654 |
| IGHV5     | IGLC2   | 0.286208235 |
| IGHV6     | IGKV1   | 0.277716281 |
| IGJ       | IGKV1   | 0.265331767 |
| IGKC      | IGLC2   | 0.315162526 |
| IGKJ5     | IGKV1   | 0.337604936 |
| IGKV1     | IGLC2   | 0.362930611 |
| IGKV2OR22 | IGLV1   | 0.28889708  |
| IGKV4     | IGLV1   | 0.304432248 |
| IGKV6     | IGLV1   | 0.267582133 |
| IGKV7     | IGLV1   | 0.299606167 |
| IGLC2     | IGLV1   | 0.3388089   |
| IGLC3     | IGLV1   | 0.290989675 |
| IGLC7     | IGLV1   | 0.287793824 |
| IGLL1     | IGLV1   | 0.311130561 |
| IGLL5     | IGLV1   | 0.301152999 |
| IGLV1     | IGLV6   | 0.317745316 |
| IGLV2     | IGLV6   | 0.299013986 |
| IGLV4     | MZB1    | 0.269218665 |
| IGLV6     | MZB1    | 0.294121639 |
| IGLV8     | MZB1    | 0.273469489 |
| IGLV9     | MZB1    | 0.276461469 |
| IKZF1     | SH2D1A  | 0.273646452 |
| JPH2      | LMOD1   | 0.272437755 |
| KAL1      | SULF1   | 0.274238703 |
| KCNMB1    | LMOD1   | 0.272610108 |
| KIAA1462  | MSRB3   | 0.262130208 |
| KIF26B    | SULF1   | 0.266041728 |
| KLHL4     | MSRB3   | 0.262768929 |
| LIMS2     | LMOD1   | 0.264774686 |
| LMOD1     | MORN5   | 0.286902283 |
| LRRC4C    | MSRB3   | 0.268897032 |
| LSM12P1   | RPL41P1 | 0.305330649 |

---
